# Supplementary material for: Removal of extracellular human amyloid beta aggregates by extracellular proteases in C. elegans
Source: eLife. 2023 Sep 20;12:e83465. doi: 10.7554/eLife.83465 (PMC10541181; doi:10.7554/eLife.83465)
Supplement: Figure 4—figure supplement 1—source data 1. — Pharmacological inhibition of collagen synthesis or cross-linking affects sfGFP::Aβ aggregate levels in the cuticle. Individual measurements, plots, and statistics are provided. [file elife-83465-fig4-figsupp1-data1.xlsx]

## Sheet: SupportingFig4.1
			Fluoresecnece intensity per pixel							Fluoresecnece intensity per pixel
			DMSO	BPY	Expt. # 1					No DMSO	BAPN	Expt. # 1
			28.631	22.502						34.348	35.926
			22.201	23.371						44.784	36.344
			19.845	19.152						42.945	38.98
			20.798	21.546						28.412	52.218
			31.529	21.472						36.087	40.788
			32.325	19.176						35.751	43.06
			30.7	24.697						36.046	46.232
			27.975	24.176						45.751	29.574
			19.636	25.292						41.494	34.376
			29.337	20.961						46.137	47.347
			23.252	20.939						36.574	38.332
			23.848	18.96						24.525	53.976
			21.419	26.635						25.001	42.896
			18.485	28.23						35.491	32.767
			27.397	31.752						27.34	45.786
			21.147	18.597						45.408	51.125
			23.246	26.865						53.209	34.083
			25.004	20.151						65.957	45.395
			23.91	19.282						43.716	48.96
			26.022	19.2						48.303	31.756
			26.598	25.308						24.482	43.005
			25.802	25.086						51.522	46.953
Statistial Analysis			24.291	21.381			Statistial Analysis			39.793	32.536
Table Analyzed	BPY Combined Trial I/N		21.956	22.21			Table Analyzed	BAPN Combined Trial I/N		31.31	36.392
			21.926	18.784						31.303	45.442
Column B	BPY		27.087	31.869			Column B	BAPN		35.354	46.614
vs.	vs.		25.61	19.793			vs.	vs.		36.056	63.677
Column A	DMSO		25.271	25.163			Column A	No DMSO		36.153	46.691
			22.301	19						43.179	53.495
Unpaired t test with Welch's correction			20.604	19.101			Unpaired t test with Welch's correction			22.734	37.758
P value	<0.0001			18.97			P value	0.0004		36.438	39.366
P value summary	****			20.944			P value summary	***			43.956
Significantly different (P < 0.05)?	Yes			20.818			Significantly different (P < 0.05)?	Yes
One- or two-tailed P value?	Two-tailed			25.007			One- or two-tailed P value?	Two-tailed		41.21	35.275	Expt. # 2
Welch-corrected t, df	t=9.741, df=137.8			23.396			Welch-corrected t, df	t=3.624, df=129.8		24.554	56.476
				19.74						46.604	47.075
How big is the difference?				17.117			How big is the difference?			42.918	45.223
Mean of column A	33.44			20.804			Mean of column A	37.57		38.929	43.392
Mean of column B	21.97						Mean of column B	43.18		38.174	30.624
Difference between means (B - A) ± SEM	-11.47 ± 1.178		28.114	19.649	Expt. # 2		Difference between means (B - A) ± SEM	5.612 ± 1.548		29.074	32.896
95% confidence interval	-13.80 to -9.144		31.295	17.452			95% confidence interval	2.548 to 8.675		39.607	45.171
R squared (eta squared)	0.4078		30.07	17.086			R squared (eta squared)	0.09191		48.232	32.473
			44.728	17.232						31.571	41.941
F test to compare variances			24.907	18.768			F test to compare variances			46.426	49.415
F, DFn, Dfd	5.650, 98, 78		34.949	19.258			F, DFn, Dfd	1.023, 64, 66		29.726	36.319
P value	<0.0001		30.1	14.783			P value	0.9266		31.166	64.092
P value summary	****		29.467	16.766			P value summary	ns		31.643	36.742
Significantly different (P < 0.05)?	Yes		34.747	15.331			Significantly different (P < 0.05)?	No		34.263	52.082
			32.289	14.606						31.584	53.506
Data analyzed			31.405	22.794			Data analyzed			25.329	58.205
Sample size, column A	99		48.754				Sample size, column A	67		28.132	30.51
Sample size, column B	79		29.449				Sample size, column B	65		29.01	32.24
			41.274							58.996	62.533
			32.474							46.714	37.41
			31.035							40.445	31.087
			35.613							37.391	52.288
			36.075							31.935	43.311
			34.683							30.857	50.299
			29.713							43.587	31.455
			28.234							49.998	48.039
			45.534							31.289	58.096
			26.059							35.825	31.132
			28.956							38.911	38.786
			26.054							34.939	35.288
			25.585							34.699	45.317
			43.731							26.527	52.132
			30.923							26.991
			37.496							50.205
			30.994							43.936
			36.52
			37.885
			37.493
			28.841	22.35	Expt. # 3
			39.026	23.158
			41.346	32.628
			44.385	23.398
			56.287	29.444
			44.22	29.513
			59.148	24.776
			38.309	22.522
			48.195	14.955
			50.283	17.629
			39.005	25.421
			49.105	34.536
			32.936	17.597
			26.384	22.3
			26.074	25.671
			47.702	34.742
			34.943	19.356
			44.37	20.314
			25.94	21.637
			70.088	25.457
			28.517	21.794
			28.517	23.986
			34.784	17.099
			24.32	23.995
			55.868	18.175
			29.909	18.395
			33.881	26.098
			37.622	16.479
			31.545	21.759
			33.366	19.23
			64.425
			29.827
			57.638
			34.911
			34.035
			60.353
