# Supplementary material for: Removal of extracellular human amyloid beta aggregates by extracellular proteases in C. elegans
Source: eLife. 2023 Sep 20;12:e83465. doi: 10.7554/eLife.83465 (PMC10541181; doi:10.7554/eLife.83465)
Supplement: Figure 4—source data 1. [file elife-83465-fig4-data1.xlsx]

## Sheet: SourceFig4A
									2022-04-09	Flower		Moss			% yes			2022-03-23	Flower		Moss			% yes			run1	Flower		Moss			% yes
		% flowers	run1	3033-03-23	2022-04-09				RNAi	yes	no	yes	no	n total	Flower	Moss		RNAi	yes	no	yes	no	n total	Flower	Moss		RNAi	yes	no	yes	no	n total	Flower	Moss
		EV	66.6667	29.0323	70.9677				EV	22	9	28	3	31	70.9677	90.3226		EV	9	22	23	8	31	29.0323	74.1935		EV	20	10	30	0	30	66.6667	100
		GFP		0	0				GFP	0	29	0	29	29	0	0		GFP	0	30	10	20	30	0	33.3333		GFP
		col-2			90				col-2	18	2	16	4	20	90	80		col-2					0				col-2
		col-113		9.09091	56.5217				col-113	13	10	18	5	23	56.5217	78.2609		col-113	2	20	11	11	22	9.09091	50		col-113
		col-89	3	0					col-89									col-89	0	29	0	29	29	0	0		col-89	1	29	0	30	30	3.33333	0
		col-79		100	82.6087				col-79	19	4	21	2	23	82.6087	91.3043		col-79	28	0	28	0	28	100	100		col-79
		col-71		66.6667	57.1429				col-71	16	12	21	2	28	57.1429	75		col-71	20	10	20	10	30	66.6667	66.6667		col-71
		col-81		36.3636	73.0769				col-81	19	7	22	4	26	73.0769	84.6154		col-81	8	14	18	4	22	36.3636	81.8182		col-81
		col-8	0	0	68.75				col-8	11	5	15	1	16	68.75	93.75		col-8	0	28	7	21	28	0	25		col-8	0	30	0	30	30	0	0
		dpy-3	0		0				dpy-3	0	27	0	27	27	0	0		dpy-3					0				dpy-3	0	22	0	22	22	0	0
		col-73		10.3448	71.4286				col-73	20	8	24	4	28	71.4286	85.7143		col-73	3	26	7	22	29	10.3448	24.1379		col-73
		% moss	run1	3033-03-23	2022-04-09
		EV	100	74.1936	90.3226
		GFP		33.3333	0
		col-2			80
		col-113		50	78.2609
		col-89	0	0
		col-79		100	91.3043
		col-71		66.6667	75
		col-81		81.8182	84.6154
		col-8	0	25	93.75
		dpy-3	0		0
		col-73		24.1379	85.7143
Within each column, compare rows (simple effects within columns)								Table Analyzed		LSD2104
Number of families				2				Two-way ANOVA		Ordinary
Number of comparisons per family				10				Alpha		0.05
Alpha				0.05
								Source of Variation	% of total variation	P value	P value summary	Significant?
Uncorrected Fisher's LSD	Predicted (LS) mean diff.	95.00% CI of diff.	Below threshold?	Summary	Individual P Value			Interaction	2.95	0.9792	ns	No
								RNAi	67.97	<0.0001	****	Yes
Flower								Aggregation type	2.758	0.1175	ns	No
EV vs. GFP	55.56	6.814 to 104.3	Yes	*	0.0272
EV vs. dpy-3	55.56	6.814 to 104.3	Yes	*	0.0272			ANOVA table	SS (Type III)	DF	MS	F (DFn, DFd)	P value
EV vs. col-89	53.89	5.147 to 102.6	Yes	*	0.0317			Interaction	1887	10	188.7	F (10, 24) = 0.2820	P=0.9792
EV vs. col-8	32.64	-10.96 to 76.23	No	ns	0.1354			RNAi	43483	10	4348	F (10, 24) = 6.497	P<0.0001
EV vs. col-73	14.67	-34.07 to 63.41	No	ns	0.5404			Aggregation type	1765	1	1765	F (1, 24) = 2.637	P=0.1175
EV vs. col-113	22.75	-25.99 to 71.49	No	ns	0.345			Residual	16063	24	669.3
EV vs. col-71	-6.349	-55.09 to 42.39	No	ns	0.7903
EV vs. col-81	0.8353	-47.91 to 49.58	No	ns	0.9721			Difference between column means
EV vs. col-2	-34.44	-96.10 to 27.21	No	ns	0.2602			Predicted (LS) mean of Flower	41.07
EV vs. col-79	-35.75	-84.49 to 12.99	No	ns	0.1432			Predicted (LS) mean of Moss	53.93
								Difference between predicted means	-12.86
Moss								SE of difference	7.918
EV vs. GFP	71.51	22.76 to 120.2	Yes	**	0.0058			95% CI of difference	-29.20 to 3.485
EV vs. dpy-3	88.17	39.43 to 136.9	Yes	**	0.001
EV vs. col-89	88.17	39.43 to 136.9	Yes	**	0.001			Data summary
EV vs. col-8	48.59	4.993 to 92.18	Yes	*	0.0304			Number of columns (Aggregation type)	2
EV vs. col-73	33.25	-15.50 to 81.99	No	ns	0.172			Number of rows (RNAi)	11
EV vs. col-113	24.04	-24.70 to 72.78	No	ns	0.3188			Number of values	46
EV vs. col-71	17.34	-31.40 to 66.08	No	ns	0.47
EV vs. col-81	4.955	-43.79 to 53.70	No	ns	0.8356
EV vs. col-2	8.172	-53.48 to 69.83	No	ns	0.7868
EV vs. col-79	-7.48	-56.22 to 41.26	No	ns	0.7542
Test details	Predicted (LS) mean 1	Predicted (LS) mean 2	Predicted (LS) mean diff.	SE of diff.	N1	N2	t	DF
Flower
EV vs. GFP	55.56	0	55.56	23.62	3	2	2.352	24
EV vs. dpy-3	55.56	2.132e-14	55.56	23.62	3	2	2.352	24
EV vs. col-89	55.56	1.667	53.89	23.62	3	2	2.282	24
EV vs. col-8	55.56	22.92	32.64	21.12	3	3	1.545	24
EV vs. col-73	55.56	40.89	14.67	23.62	3	2	0.6211	24
EV vs. col-113	55.56	32.81	22.75	23.62	3	2	0.9633	24
EV vs. col-71	55.56	61.9	-6.349	23.62	3	2	0.2688	24
EV vs. col-81	55.56	54.72	0.8353	23.62	3	2	0.03537	24
EV vs. col-2	55.56	90	-34.44	29.87	3	1	1.153	24
EV vs. col-79	55.56	91.3	-35.75	23.62	3	2	1.514	24
Moss
EV vs. GFP	88.17	16.67	71.51	23.62	3	2	3.028	24
EV vs. dpy-3	88.17	2.132e-14	88.17	23.62	3	2	3.734	24
EV vs. col-89	88.17	2.132e-14	88.17	23.62	3	2	3.734	24
EV vs. col-8	88.17	39.58	48.59	21.12	3	3	2.3	24
EV vs. col-73	88.17	54.93	33.25	23.62	3	2	1.408	24
EV vs. col-113	88.17	64.13	24.04	23.62	3	2	1.018	24
EV vs. col-71	88.17	70.83	17.34	23.62	3	2	0.7342	24
EV vs. col-81	88.17	83.22	4.955	23.62	3	2	0.2098	24
EV vs. col-2	88.17	80	8.172	29.87	3	1	0.2736	24
EV vs. col-79	88.17	95.65	-7.48	23.62	3	2	0.3167	24

## Sheet: SourceFig4B
L1	flower		moss				L4	flower		moss
EV	63.6364	66.6667	95.4545	96.2963			EV	80.7692	85.7143	100	100
GFP	54.5455	17.8571	95.4545	71.4286			GFP	76.9231	50	92.3077	95.4545
dpy-3	0	0	0	0			dpy-3	50	95.8333	90	100
col-8	33.3333	21.7391	55.5556	56.5217			col-8	27.2727	42.8571	77.2727	85.7143
col-89	36.3636	50	81.8182	88.4615			col-89	45	40	85	92
Table Analyzed		LSD2104 L1								Table Analyzed		LSD2104 L4
Two-way ANOVA		Ordinary								Two-way ANOVA		Ordinary
Alpha		0.05								Alpha		0.05
Source of Variation	% of total variation	P value	P value summary	Significant?						Source of Variation	% of total variation	P value	P value summary	Significant?
Interaction	6.083	0.0771	ns	No						Interaction	6.956	0.4081	ns	No
RNAi	68.74	<0.0001	****	Yes						RNAi	27.87	0.026	*	Yes
Aggregation type	19.96	0.0001	***	Yes						Aggregation type	49.37	0.0002	***	Yes
ANOVA table	SS	DF	MS	F (DFn, DFd)	P value					ANOVA table	SS	DF	MS	F (DFn, DFd)	P value
Interaction	1342	4	335.6	F (4, 10) = 2.920	P=0.0771					Interaction	736.8	4	184.2	F (4, 10) = 1.100	P=0.4081
RNAi	15171	4	3793	F (4, 10) = 33.00	P<0.0001					RNAi	2952	4	738	F (4, 10) = 4.408	P=0.0260
Aggregation type	4406	1	4406	F (1, 10) = 38.34	P=0.0001					Aggregation type	5229	1	5229	F (1, 10) = 31.23	P=0.0002
Residual	1149	10	114.9							Residual	1674	10	167.4
Difference between column means										Difference between column means
Mean of Flower	34.41									Mean of Flower	59.44
Mean of Moss	64.1									Mean of Moss	91.77
Difference between means	-29.68									Difference between means	-32.34
SE of difference	4.794									SE of difference	5.786
95% CI of difference	-40.37 to -19.00									95% CI of difference	-45.23 to -19.45
Data summary										Data summary
Number of columns (Aggregation type)	2									Number of columns (Aggregation type)	2
Number of rows (RNAi)	5									Number of rows (RNAi)	5
Number of values	20									Number of values	20
Dunnett's multiple comparisons test	Mean Diff.	95.00% CI of diff.	Below threshold?	Summary	Adjusted P Value					Dunnett's multiple comparisons test	Mean Diff.	95.00% CI of diff.	Below threshold?	Summary	Adjusted P Value
Flower										Flower
EV vs. GFP	28.95	-2.038 to 59.94	No	ns	0.0681					EV vs. GFP	19.78	-17.62 to 57.18	No	ns	0.3996
EV vs. dpy-3	65.15	34.16 to 96.14	Yes	***	0.0004					EV vs. dpy-3	10.33	-27.07 to 47.72	No	ns	0.839
EV vs. col-8	37.62	6.627 to 68.60	Yes	*	0.0183					EV vs. col-8	48.18	10.78 to 85.58	Yes	*	0.0129
EV vs. col-89	21.97	-9.019 to 52.96	No	ns	0.1909					EV vs. col-89	40.74	3.343 to 78.14	Yes	*	0.0328
Moss										Moss
EV vs. GFP	12.43	-18.55 to 43.42	No	ns	0.6167					EV vs. GFP	6.119	-31.28 to 43.52	No	ns	0.9681
EV vs. dpy-3	95.88	64.89 to 126.9	Yes	****	<0.0001					EV vs. dpy-3	5	-32.40 to 42.40	No	ns	0.9843
EV vs. col-8	39.84	8.848 to 70.83	Yes	*	0.0131					EV vs. col-8	18.51	-18.89 to 55.91	No	ns	0.4528
EV vs. col-89	10.74	-20.25 to 41.72	No	ns	0.7179					EV vs. col-89	11.5	-25.90 to 48.90	No	ns	0.7872
Test details	Mean 1	Mean 2	Mean Diff.	SE of diff.	N1	N2	q	DF		Test details	Mean 1	Mean 2	Mean Diff.	SE of diff.	N1	N2	q	DF
Flower										Flower
EV vs. GFP	65.15	36.2	28.95	10.72	2	2	2.7	10		EV vs. GFP	83.24	63.46	19.78	12.94	2	2	1.529	10
EV vs. dpy-3	65.15	0	65.15	10.72	2	2	6.077	10		EV vs. dpy-3	83.24	72.92	10.33	12.94	2	2	0.798	10
EV vs. col-8	65.15	27.54	37.62	10.72	2	2	3.509	10		EV vs. col-8	83.24	35.06	48.18	12.94	2	2	3.724	10
EV vs. col-89	65.15	43.18	21.97	10.72	2	2	2.049	10		EV vs. col-89	83.24	42.5	40.74	12.94	2	2	3.149	10
Moss										Moss
EV vs. GFP	95.88	83.44	12.43	10.72	2	2	1.16	10		EV vs. GFP	100	93.88	6.119	12.94	2	2	0.4729	10
EV vs. dpy-3	95.88	0	95.88	10.72	2	2	8.943	10		EV vs. dpy-3	100	95	5	12.94	2	2	0.3864	10
EV vs. col-8	95.88	56.04	39.84	10.72	2	2	3.716	10		EV vs. col-8	100	81.49	18.51	12.94	2	2	1.43	10
EV vs. col-89	95.88	85.14	10.74	10.72	2	2	1.001	10		EV vs. col-89	100	88.5	11.5	12.94	2	2	0.8888	10

## Sheet: SourceFig4D
						intensity per number of pixels
						cle-1 (COL18A1)
						22.10.2020	29.10.2020	05.11.2020	run 4	run 5
						73.7677		70.5824	52.2792	58.3091
						42.6411		32.4547	73.6471
						45.4996		50.8335	81.9126
						71.0394			39.6856
						54.4183			84.9557
						70.0195			54.6029
						65.3342			38.758
						42.9559			99.3595
						53.9971			37.5038
						39.5294			64.8585
						58.9853
						46.4817
						51.8225
						54.8253
						44.3094
						64.6195
						45.0524
Table Analyzed	Grouped IperN cle-1					44.7969
Data sets analyzed	A-J
ANOVA summary
F	9.565
P value	<0.0001
P value summary	****
Significant diff. among means (P < 0.05)?	Yes
R squared	0.4754
Brown-Forsythe test
F (DFn, DFd)	3.544 (9, 95)
P value	0.0008
P value summary	***
Are SDs significantly different (P < 0.05)?	Yes
Bartlett's test
Bartlett's statistic (corrected)
P value
P value summary
Are SDs significantly different (P < 0.05)?
ANOVA table	SS	DF	MS	F (DFn, DFd)	P value
Treatment (between columns)	63946	9	7105	F (9, 95) = 9.565	P<0.0001
Residual (within columns)	70567	95	742.8
Total	134513	104
Data summary
Number of treatments (columns)	10
Number of values (total)	105
Dunnett's multiple comparisons test		Mean Diff.	95.00% CI of diff.	Below threshold?	Summary	Adjusted P Value	A-?
sfGFP::Aβ vs. cle-1 (COL18A1)		47.3	22.78 to 71.82	Yes	****	<0.0001	E	cle-1 (COL18A1)
Test details		Mean 1	Mean 2	Mean Diff.	SE of diff.	n1	n2	q	DF
sfGFP::Aβ vs. cle-1 (COL18A1)		102.4	55.12	47.3	8.754	21	18	5.403	95

## Sheet: SourceFig4C
																							run1 EV	run1 GFP	run1 dpy-3	run1 col-8	run1 col-89		run1 EV	run1 GFP	run1 dpy-3	run1 col-8	run1 col-89				run1 EV	run1 GFP	run1 dpy-3	run1 col-8	run1 col-89		run1 EV	run1 GFP	run1 dpy-3	run1 col-8	run1 col-89
																						average	1.6295e+07	1.01034e+07	5.63012e+06	6.94039e+06	1.59415e+07		100	62.0031	34.5512	42.5921	97.8304			average	1.64846e+07	8.89646e+06	1.00355e+07	1.23428e+07	8.89478e+06		100	53.9684	60.8781	74.8746	53.9581
																						L1	9342774	6853316	4388738	6109647	22125799		57.3352	42.0578	26.933	37.494	135.783			L4	10254136	4989533	8198984	7577542	8035822		62.2044	30.2679	49.7373	45.9674	48.7475
																							8884002	8254664	5457001	8279011	16300239		54.5198	50.6576	33.4888	50.807	100.032				12420775	8525265	18297938	4282874	8037738		75.3478	51.7166	111	25.9811	48.7591
																							13573383	5426612	6406101	8389857	10686832		83.2978	33.3023	39.3133	51.4873	65.5835				21791619	7017343	13956131	24700252	8839758		132.194	42.5691	84.6617	149.838	53.6244
																							27490538	6273429	1643315	3587309	21725985		168.705	38.4991	10.0848	22.0148	133.329				17630349	9678137	2636327	12618434	8348795		106.95	58.7102	15.9927	76.5469	50.6461
																							20081915	8221898	7452220	5391988	21926232		123.24	50.4565	45.7331	33.0898	134.558				20542598	8420929	5888406	11409662	8554583		124.617	51.0836	35.7207	69.2141	51.8944
																							23541401	5916309	6452910	4486689	9638680		144.47	36.3075	39.6005	27.5341	59.1511				23068631	6812693	17678059	5251758	5963544		139.941	41.3277	107.24	31.8586	36.1765
																							33867196	6400810	8188952	2265482	17238853		207.838	39.2808	50.2543	13.9029	105.792				21148676	6655564	16042535	13225983	4608507		128.294	40.3745	97.3184	80.2324	27.9565
																							12536021	9719847	7723829	1873063	13957535		76.9316	59.6492	47.4	11.4947	85.6553				9878450	2687112	8703553	8640465	10012537		59.9254	16.3008	52.7981	52.4154	60.7388
																							13427667	9273781	3180389	2880218	10228021		82.4035	56.9118	19.5176	17.6755	62.7678				24216057	13283332	10972488	8656531	9083271		146.901	80.5803	66.5621	52.5129	55.1016
																							14277737	14033637	5130889	11561862	17223892		87.6203	86.1223	31.4875	70.9534	105.7				26560362	7910198	15709958	5607862	11421247		161.122	47.9854	95.3009	34.0188	69.2844
																							6596192	14625198	3502805	11464662	10362827		40.4798	89.7526	21.4962	70.3569	63.5951				33854549	13316153	3893463	17068207	8437035		205.371	80.7794	23.6188	103.54	51.1814
																							11326114	10291278	7175479	3079403	16709915		69.5066	63.156	44.0348	18.8978	102.546				19343390	12362269	10446094	15367766	4060019		117.342	74.9929	63.3689	93.2251	24.6292
																							12250166	11620738	2219164	13414261	11111805		75.1774	71.3147	13.6187	82.3213	68.1915				13798799	6976600	6496319	16897075	10713452		83.7073	42.322	39.4084	102.502	64.9907
																							13592044	16951597	5503569	5710602	13659346		83.4123	104.029	33.7746	35.0451	83.8253				12586367	7476438	6653847	6139402	8951498		76.3523	45.3541	40.364	37.2433	54.3022
																							11806095	25492399	6061414	8814023	23044061		72.4522	156.443	37.198	54.0903	141.418				10956946	7812223	6694264	3405177	15032096		66.4678	47.3911	40.6092	20.6567	91.1888
																							22297324	16093607	10412602	6997594	26806561		136.835	98.764	63.9006	42.9432	164.508				19719690	6392269	5853393	7074263	13428911		119.625	38.7772	35.5083	42.9144	81.4634
																							15445190	14400840	5236938	9616031	9903217		94.7848	88.3758	32.1383	59.0121	60.7745				14939563	10619035	6540340	12485767	6863460		90.6275	64.418	39.6755	75.7421	41.6356
																							21644904	18690222	5205803	5208730	15064111		132.831	114.699	31.9472	31.9652	92.4462				9891608	6713608	6350133	23789256	7484248		60.0052	40.7266	38.5216	144.312	45.4015
																							21853805	5516253		14851288	18813094		134.113	33.8524		91.1401	115.453				11120384	14767698	14524923	22614114	7023043		67.4593	89.5849	88.1121	137.183	42.6037
																							15681803	1651429		5675211	20131023		96.2368	10.1346		34.8279	123.541				13462505	10254167	15172818	19983300	12996009		81.6672	62.2046	92.0424	121.224	78.8373
																							11891567	5686276		5359442	17337823		72.9767	34.8958		32.8901	106.4				14287385	7660153		15437849			86.6712	46.4686		93.6502
																							22295579	11730288		7672316	19705475		136.825	71.987		47.0838	120.929				12969364	15391427		9307411			78.6757	93.3686		56.4613
																							27616277	5312980			23524795		169.477	32.6049			144.368				5974600						36.2436
																							14757813	6500543			6639445		90.5664	39.8928			40.7453				13566345						82.2971
Normalized intensity L1											Normalized intensity L4												11632109	18530424			6688753		71.3845	113.718			41.0479				15385716						93.3339
EV		GFP		dpy-3		col-8		col-89			EV		GFP		dpy-3		col-8		col-89				12910281	3937863			13923990		79.2284	24.1661			85.4494				19230422						116.657
57.3352	91.9233	42.0578	120.135	26.933	12.161	37.494	57.9196	135.783	11.9758		62.2044	106.831	30.2679	116.495	49.7373	56.3336	45.9674	85.6209	48.7475	19.2276			12765776	5385864					78.3416	33.0522
54.5198	103.664	50.6576	128.608	33.4888	15.4998	50.807	102.98	100.032	83.0114		75.3478	118.937	51.7166	46.6296	111	130.948	25.9811	114.097	48.7591	22.5434			12874645						79.0097
83.2978	45.4336	33.3023	116.488	39.3133	11.3546	51.4873	125.334	65.5835	76.8554		132.194	59.6323	42.5691	37.5279	84.6617	171.309	149.839	96.9762	53.6244	68.6487
168.705	60.3657	38.4991	35.6908	10.0848	11.4222	22.0148	68.8222	133.329	78.0404		106.951	87.3761	58.7102	50.233	15.9927	248.859	76.5469	58.6259	50.6461	84.3516
123.24	104.02	50.4565	59.1574	45.7331	18.5788	33.0898	24.0701	134.558	84.278		124.617	82.8153	51.0836	51.5965	35.7207	262.32	69.2141	61.7915	51.8944	76.07			run2 EV	run2 GFP	run2 dpy-3	run2 col-8	run2 col-89		run2 EV	run2 GFP	run2 dpy-3	run2 col-8	run2 col-89				run2 EV	run2 GFP	run2 dpy-3	run2 col-8	run2 col-89		run2 EV	run2 GFP	run2 dpy-3	run2 col-8	run2 col-89
144.47	112.456	36.3075	121.235	39.6005	18.2835	27.5341	230.53	59.1511	40.2261		139.941	157.233	41.3276	104.825	107.24	91.4476	31.8586	79.7706	36.1765	80.5001		average	3.86253e+06	5.81419e+06	767818	3.3683e+06	2.38333e+06		100	150.528	19.8786	87.2044	61.704			average	6.40359e+06	4.57494e+06	9.22539e+06	4.57501e+06	6.03152e+06		100	71.4433	144.066	71.4444	94.1895
207.838	45.744	39.2808	61.4371	50.2544	25.8093	13.9029	243.589	105.792	58.331		128.294	102.441	40.3745	131.349	97.3184	258.765	80.2324	123.133	27.9565	86.8991		L1	3550568	4640234	469721	2237162	462569		91.9233	120.135	12.161	57.9196	11.9758			L4	6841006	7459872	3607375	5482813	1231258		106.831	116.495	56.3336	85.6209	19.2276
76.9317	156.784	59.6492	73.1255	47.4	25.3768	11.4947	159.908	85.6553	56.2735		59.9254	151.904	16.3008	88.6596	52.7981	319.592	52.4154	74.0097	60.7388	58.1671			4004065	4967516	598686	3977650	3206342		103.664	128.608	15.4998	102.98	83.0114				7616236	2985972	8385369	7306329	1443586		118.937	46.6296	130.948	114.097	22.5434
82.4035	108.811	56.9118	167.562	19.5176	30.8656	17.6755	108.71	62.7678	39.9506		146.901	223.002	80.5803	115.905	66.5621	85.3877	52.5129	72.2957	55.1016	102.904			1754888	4499396	438576	4841074	2968562		45.4336	116.488	11.3546	125.334	76.8553				3818608	2403132	10969952	6209961	4395984		59.6323	37.5279	171.309	96.9762	68.6487
87.6203	288.418	86.1223	91.3698	31.4875	15.378	70.9534	39.971	105.7	71.1055		161.122	68.4662	47.9854	45.3414	95.3009	91.1331	34.0188	37.4604	69.2844	37.0421			2331645	1378567	441186	2658281	3014335		60.3657	35.6908	11.4222	68.8222	78.0404				5595209	3216719	15935893	3754166	5401534		87.3761	50.233	248.859	58.6259	84.3516
40.4798	68.2651	89.7526	113.551	21.4962	13.0719	70.3569	29.0117	63.5951	66.26		205.371	119.856	80.7794	50.1052	23.6188	80.134	103.54	71.0622	51.1814	30.5117			4017825	2284975	717612	929714	3255266		104.021	59.1574	18.5788	24.0701	84.278				5303152	3304030	16797911	3956877	4871213		82.8152	51.5965	262.32	61.7915	76.07
69.5066	54.9593	63.156	120.397	44.0348	18.4033	18.8978	57.4158	102.546	73.689		117.342	75.123	74.9929	56.1613	63.3689	257.133	93.225	75.5325	24.6292	123.965			4343665	4682732	706206	8904309	1553746		112.456	121.235	18.2835	230.53	40.2261				10068534	6712571	5855933	5108184	5154902		157.233	104.825	91.4476	79.7706	80.5001
75.1774	163.702	71.3147	314.63	13.6187	16.0234	82.3213	40.4805	68.1915	44.0758		83.7073	35.5233	42.322	101.275	39.4084	83.139	102.502	44.7583	64.9907	146.783			1766875	2373029	996891	9408690	2253054		45.744	61.4371	25.8093	243.589	58.331				6559888	8411030	16570287	7884966	5564666		102.441	131.349	258.765	123.133	86.8991
83.4123	102.573	104.029	312.23	33.7746	25.0166	35.0451	59.2167	83.8253	20.9765		76.3523	204.19	45.3541	98.6733	40.364	76.4269	37.2433	21.5792	54.3022	123.565			6055841	2824495	980187	6176495	2173581		156.784	73.1255	25.3768	159.908	56.2735				9727335	5677400	20465376	4739282	3724782		151.904	88.6596	319.592	74.0097	58.1671
72.4522	81.9836	156.443	440.839	37.198	13.9832	54.0903	48.4125	141.418	77.8341		66.4678	202.636	47.3911	46.9445	40.6092	84.5447	20.6567	34.4694	91.1888	93.7107			4202865	6472118	1192192	4198953	1543104		108.811	167.562	30.8656	108.71	39.9506				14280174	7422107	5467884	4629524	6589559		223.003	115.905	85.3877	72.2957	102.904
136.835	84.3371	98.764	179.556	63.9006	16.5327	42.9432	88.4825	164.508	50.6645		119.625	64.5955	38.7772	50.0428	35.5083	173.139	42.9144	82.7385	81.4634	129.69			11140225	3529187	593979	1543892	2746471		288.418	91.3698	15.378	39.971	71.1055				4384296	2903480	5835794	2398814	2372024		68.4662	45.3414	91.1331	37.4604	37.0421
94.7848	75.5834	88.3758	89.3684	32.1383	26.6927	59.0121	41.7092	60.7745	82.3361		90.6275	84.3042	64.418	39.6743	39.6755	209.581	75.7421	52.0789	41.6356	165.08			2636759	4385944	504906	1120587	2559314		68.265	113.551	13.0719	29.0117	66.26				7675125	3208536	5131454	4550533	1953845		119.857	50.1052	80.134	71.0622	30.5117
132.832	112.555	114.699	59.3273	31.9472	12.2683	31.9652	71.5421	92.4462	52.1081		60.0052	110.246	40.7266	35.734	38.5216	199.862	144.312	97.8784	45.4015	189.779			2122819	4650383	710832	2217703	2846261		54.9593	120.397	18.4033	57.4158	73.689				4810572	3596341	16465746	4836795	7938236		75.123	56.1613	257.133	75.5325	123.965
134.113	83.1805	33.8524	224.55		40.7113	91.1401	100.319	115.453	48.7011		67.4593	45.7223	89.5849	32.1304	88.1121	113.864	137.183	79.339	42.6037	223.674			6323050	12152698	618909	1563572	1702443		163.702	314.63	16.0234	40.4805	44.0758				2274765	6485249	5323884	2866137	9399364		35.5233	101.275	83.139	44.7583	146.783
96.2368	55.2401	10.1346	210.636		33.6775	34.8279	111.586	123.541	87.65		81.6672	107.702	62.2046	136.027	92.0425	92.4487	121.224	38.0384	78.8373	105.922			3961896	12059996	966276	2287263	810225		102.573	312.23	25.0166	59.2167	20.9765				13075486	6318636	4894069	1381842	7912591		204.19	98.6733	76.4269	21.5792	123.565
72.9767		34.8958	93.9142		28.1851	32.8901	108.971	106.4	80.524		86.6712	52.2708	46.4686	72.2483		119.885	93.6502	61.5979		64.2462			3166643	17027539	540104	1869949	3006367		81.9836	440.839	13.9832	48.4125	77.8341				12975990	3006136	5413898	2207281	6000855		202.636	46.9445	84.5447	34.4694	93.7107
136.825		71.987	246.952		18.0181	47.0838	64.4509	120.93	40.7659		78.6757	141.569	93.3686	64.1748		71.9851	56.4613	97.577		45.986			3257546	6935422	638581	3417665	1956931		84.3371	179.556	16.5327	88.4825	50.6645				4136432	3204536	11087108	5298237	8304851		64.5955	50.0428	173.139	82.7385	129.69
169.477		32.605	81.3828		9.89452		59.3936	144.368	93.5583		36.2435	70.7992				88.1889		82.7903		78.587			2919434	3451882	1031015	1611031	3180256		75.5834	89.3684	26.6927	41.7092	82.3361				5398497	2540584	13420702	3334920	10571073		84.3042	39.6743	209.581	52.0789	165.08
90.5665		39.8928					142.082	40.7453			82.2971	77.9312				91.153				114.717			4347482	2291536	473866	2763335	2012692		112.555	59.3273	12.2683	71.5421	52.1081				7059729	2288257	12798327	6267737	12152695		110.246	35.734	199.862	97.8784	189.779
71.3845		113.718					50.7298	41.0479			93.3339	76.8909								98.8234			3212875	8673313	1572486	3874842	1881094		83.1805	224.55	40.7113	100.319	48.7011				2927867	2057499	7291360	5080547	14323196		45.7222	32.1304	113.864	79.339	223.674
79.2284		24.1661					31.6771	85.4494			116.657	107.673								77.5331			2133666	8135868	1300802	4310056	3385508		55.2401	210.636	33.6774	111.586	87.65				6896779	8710640	5920036	2435824	6782788		107.702	136.027	92.4487	38.0384	105.922
78.3416		33.0522										75.088												3627466	1088659	4209019	3110265			93.9142	28.1851	108.97	80.524				3347208	4626487	7676955	3944477	4114068		52.2708	72.2483	119.885	61.5979	64.2462
79.0097												81.5423												9538601	695954	2489436	1574594			246.952	18.0181	64.4509	40.7659				9065481	4109494	4609632	6248436	2944758		141.569	64.1748	71.9851	97.577	45.986
												79.5906												3143436	382179	2294098	3613717			81.3828	9.89452	59.3936	93.5583				4533691		5647260	5301556	5032392		70.7992		88.1889	82.7903	78.587
												75.5359														5487955						142.082					4990396		5837070		7346036		77.9312		91.153		114.717
												52.5738														1959456						50.7298					4923779				6328249		76.8909				98.8234
																										1223539						31.6771					6894920				4964907		107.673				77.5331
Table Analyzed		L1									Table Analyzed		L4																								4808331						75.088
Data sets analyzed		A-E									Data sets analyzed		A-E																								5221637						81.5423
																																					5096658						79.5906
ANOVA summary											ANOVA summary																										4837011						75.5359
F		17.64									F		9.186																								3366611						52.5738
P value		<0.0001									P value		<0.0001
P value summary		****									P value summary		****
Significant diff. among means (P < 0.05)?		Yes									Significant diff. among means (P < 0.05)?		Yes
R squared		0.3607									R squared		0.2329
Brown-Forsythe test											Brown-Forsythe test
F (DFn, DFd)		5.616 (4, 125)									F (DFn, DFd)		2.569 (4, 121)
P value		0.0003									P value		0.0414
P value summary		***									P value summary		*
Are SDs significantly different (P < 0.05)?		Yes									Are SDs significantly different (P < 0.05)?		Yes
Bartlett's test											Bartlett's test
Bartlett's statistic (corrected)		71.95									Bartlett's statistic (corrected)		13.55
P value		<0.0001									P value		0.0089
P value summary		****									P value summary		**
Are SDs significantly different (P < 0.05)?		Yes									Are SDs significantly different (P < 0.05)?		Yes
ANOVA table		SS	DF	MS	F (DFn, DFd)	P value					ANOVA table		SS	DF	MS	F (DFn, DFd)	P value
Treatment (between columns)		89101	4	22275	F (4, 125) = 17.64	P<0.0001					Treatment (between columns)		30458	4	7614	F (4, 121) = 9.186	P<0.0001
Residual (within columns)		157889	125	1263							Residual (within columns)		100302	121	828.9
Total		246990	129								Total		130759	125
Data summary											Data summary
Number of treatments (columns)		5									Number of treatments (columns)		5
Number of values (total)		130									Number of values (total)		126
Number of families		1									Number of families		1
Number of comparisons per family		4									Number of comparisons per family		4
Alpha		0.05									Alpha		0.05
Dunnett's multiple comparisons test		Mean Diff.	95.00% CI of diff.	Below threshold?	Summary	Adjusted P Value	A-?				Dunnett's multiple comparisons test		Mean Diff.	95.00% CI of diff.	Below threshold?	Summary	Adjusted P Value	A-?
EV vs. GFP		0.5842	-23.18 to 24.35	No	ns	>0.9999	B	GFP			EV vs. GFP		35.11	15.13 to 55.08	Yes	***	0.0001	B	GFP
EV vs. dpy-3		73.31	48.51 to 98.10	Yes	****	<0.0001	C	dpy-3			EV vs. dpy-3		-7.321	-26.81 to 12.16	No	ns	0.7728	C	dpy-3
EV vs. col-8		32.52	8.527 to 56.52	Yes	**	0.0039	D	col-8			EV vs. col-8		24.48	4.758 to 44.20	Yes	**	0.0093	D	col-8
EV vs. col-89		20.18	-3.816 to 44.18	No	ns	0.1259	E	col-89			EV vs. col-89		20.74	1.678 to 39.79	Yes	*	0.0281	E	col-89
Test details		Mean 1	Mean 2	Mean Diff.	SE of diff.	n1	n2	q	DF		Test details		Mean 1	Mean 2	Mean Diff.	SE of diff.	n1	n2	q	DF
EV vs. GFP		99.6	99.02	0.5842	9.586	28	27	0.06094	125		EV vs. GFP		97.81	62.71	35.11	8.026	31	22	4.374	121
EV vs. dpy-3		99.6	26.3	73.31	10	28	23	7.33	125		EV vs. dpy-3		97.81	105.1	-7.321	7.828	31	24	0.9352	121
EV vs. col-8		99.6	67.08	32.52	9.679	28	26	3.36	125		EV vs. col-8		97.81	73.33	24.48	7.923	31	23	3.09	121
EV vs. col-89		99.6	79.42	20.18	9.679	28	26	2.085	125		EV vs. col-89		97.81	77.08	20.74	7.657	31	26	2.708	121

## Sheet: SourceFig4E
																			2020-10-16	Moss %	Flower %
						2020-10-16	2022-04-07	2020-10-16	2022-04-07										sfGFP::Aβ	100	70.8
						Flower		Moss											sfGFP::Aβ(F20S,L35P)	0	0
					sfGFP::Aβ	70.8	54.5	100	100										cle-1(COL18A1)	100	57.1
					sfGFP::Aβ(F20S,L35P)	0		0
					cle-1(COL18A1)	57.1	23.8	100	19										2022-04-07	moss structure			flower structure
																			LSD2104 crossed into	yes	no	%yes	yes	no	% yes
																			WT (N2)	11	0	100	6	5	54.5455
																			VC855 (cle-1)	4	17	19.0476	5	16	23.8095
Table Analyzed	in cle-1 mut.agg					Within each column, compare rows (simple effects within columns)
Two-way RM ANOVA	Matching: Across row					Number of families	2
Assume sphericity?	Yes					Number of comparisons per family	3
Alpha	0.05					Alpha	0.05
Source of Variation	% of total variation	P value	P value summary	Significant?		Šídák's multiple comparisons test	Predicted (LS) mean diff.	95.00% CI of diff.	Below threshold?	Summary	Adjusted P Value
Row Factor x Time	3.329	0.5668	ns	No
Row Factor	60.75	0.2733	ns	No		Flower
Time	5.452	0.2544	ns	No		sfGFP::Aβ vs. sfGFP::Aβ(F20S,L35P)	62.65	-89.35 to 214.6	No	ns	0.448
Subject	22.85	0.1601	ns	No		sfGFP::Aβ vs. cle-1(COL18A1)	22.2	-101.9 to 146.3	No	ns	0.8892
						sfGFP::Aβ(F20S,L35P) vs. cle-1(COL18A1)	-40.45	-192.4 to 111.5	No	ns	0.7298
ANOVA table	SS	DF	MS	F (DFn, DFd)	P value
Row Factor x Time	485.5	2	242.8	F (2, 2) = 0.7643	P=0.5668	Moss
Row Factor	8862	2	4431	F (2, 2) = 2.659	P=0.2733	sfGFP::Aβ vs. sfGFP::Aβ(F20S,L35P)	100	-52.00 to 252.0	No	ns	0.1708
Time	795.2	1	795.2	F (1, 2) = 2.504	P=0.2544	sfGFP::Aβ vs. cle-1(COL18A1)	40.5	-83.61 to 164.6	No	ns	0.6076
Subject	3333	2	1666	F (2, 2) = 5.246	P=0.1601	sfGFP::Aβ(F20S,L35P) vs. cle-1(COL18A1)	-59.5	-211.5 to 92.50	No	ns	0.4838
Residual	635.2	2	317.6
Difference between column means						Test details	Predicted (LS) mean 1	Predicted (LS) mean 2	Predicted (LS) mean diff.	SE of diff.	N1	N2	t	DF
Mean of Flower	34.37
Mean of Moss	53.17					Flower
Difference between means	-18.8					sfGFP::Aβ vs. sfGFP::Aβ(F20S,L35P)	62.65	0	62.65	38.57	2	1	1.624	4
SE of difference	11.88					sfGFP::Aβ vs. cle-1(COL18A1)	62.65	40.45	22.2	31.5	2	2	0.7049	4
95% CI of difference	-69.92 to 32.32					sfGFP::Aβ(F20S,L35P) vs. cle-1(COL18A1)	0	40.45	-40.45	38.57	1	2	1.049	4
Data summary						Moss
Number of columns (Time)	2					sfGFP::Aβ vs. sfGFP::Aβ(F20S,L35P)	100	0	100	38.57	2	1	2.592	4
Number of rows (Row Factor)	3					sfGFP::Aβ vs. cle-1(COL18A1)	100	59.5	40.5	31.5	2	2	1.286	4
Number of subjects (Subject)	5					sfGFP::Aβ(F20S,L35P) vs. cle-1(COL18A1)	0	59.5	-59.5	38.57	1	2	1.543	4
Number of missing values	0
