# Supplementary material for: Removal of extracellular human amyloid beta aggregates by extracellular proteases in C. elegans
Source: eLife. 2023 Sep 20;12:e83465. doi: 10.7554/eLife.83465 (PMC10541181; doi:10.7554/eLife.83465)
Supplement: Figure 5—source data 1. — Individual measurements, independent biological trials, raw and processed data, and statistics are provided. [file elife-83465-fig5-data1.xlsx]

## Sheet: SourceFig5B
									Control treatment: DMSO				Batimastat					2021-11-29	raw		Normalized			2021.11.24	raw		Normalized			2021-11-20	raw		Normalized
									2021.11.20	2021.11.24	2021.11.29		2021.11.20	2021.11.24	2021.11.29				ctrl	bati	ctrl	bati			ctrl	bati	ctrl	bati			ctrl	bati	ctrl	bati
									111.72	122.81	41.9683		612.381	215.433	530.169			average	77958.9	906069	100	1162.24		average	4.89976e+06	7.92904e+06	100	161.825		average	1.09581e+06	4.45282e+06	100	406.351
									70.5916	110.809	117.721		810.332	59.1826	1731.36			std. dev	67414.9	709393	86.475	909.957		std. dev	2.87243e+06	4.06981e+06	58.6238	83.0615		std. dev	883602	2.18115e+06	80.6348	199.045
									21.4725	228.889	8.19791		436.611	100.631	1381.95				32718	413314	41.9683	530.169			6017392	10555689	122.81	215.433			1224231	6710512	111.72	612.381
									117.213	67.8164	15.1298		667.458	120.057	618.482				91774	1349750	117.721	1731.36			5429369	2899803	110.809	59.1826			773547	8879669	70.5916	810.332
									258.693	124.121	178.792		121.144	187.033	987.713				6391	1077355	8.19791	1381.95			11215008	4930685	228.889	100.631			235297	4784413	21.4725	436.611
									39.1936	281.069	138.367		284.017	37.8755	708.99				11795	482162	15.1298	618.482			3322839	5882495	67.8164	120.057			1284427	7314050	117.213	667.458
									114.802	44.8881	120.118		545.707	205.646	537.089				139384	770010	178.792	987.713			6081622	9164174	124.121	187.033			2834779	1327506	258.693	121.144
									66.2613	45.4581	28.3675		275.555	260.627	275.35				107869	552721	138.366	708.99			13771700	1855809	281.069	37.8755			429486	3112278	39.1936	284.017
									356.83	54.7448	32.6262		293.206	62.5265	1148.39				93643	418709	120.118	537.089			2199407	10076144	44.8881	205.646			1258003	5979893	114.802	545.707
									74.2501	52.1023	163.998		586.995	154.541	1802.38				22115	214660	28.3675	275.35			2227334	12770103	45.4581	260.627			726096	3019548	66.2613	275.555
									23.0538	35.6669	110.824		574.323	56.8972	2322.02				25435	895273	32.6262	1148.39			2682361	3063646	54.7448	62.5265			3910164	3212973	356.83	293.206
									128.06	29.4185	126.082		146.446	72.5559	425.282				127851	1405113	163.998	1802.38			2552886	7572141	52.1023	154.541			813637	6432333	74.2501	586.995
									77.8044	81.6477	22.2143		411.687	86.1465	725.863				86397	1810219	110.824	2322.02			1747589	2787824	35.6669	56.8972			252625	6293465	23.0538	574.323
									77.4409	131.905	76.017		346.264	78.6944	745.274				98292	331545	126.082	425.282			1441437	3555065	29.4185	72.5559			1403285	1604764	128.06	146.446
									48.3708	71.5887	23.0955		312.156	178.475	444.248				17318	565875	22.2143	725.863			4000537	4220971	81.6477	86.1465			852586	4511292	77.8044	411.687
									144.63	77.5025	56.9826		353.146	182.474	513.047				59262	581007	76.017	745.273			6463033	3855836	131.905	78.6944			848602	3794378	77.4409	346.263
									77.6711	46.394	239.256		416.152	158.87	852.932				18005	346331	23.0955	444.248			3507673	8744823	71.5887	178.475			530051	3420625	48.3709	312.156
									61.8732	67.0347	367.49		813.979	159.638	1421.84				44423	399966	56.9826	513.047			3797432	8940767	77.5025	182.474			1584864	3869802	144.63	353.146
									30.07	123.377	65.1099		298.682	168.503	3383.83				186521	664936	239.256	852.931			2273193	7784249	46.394	158.87			851125	4560226	77.6711	416.152
										184.83	67.6446		293.94	149.329	3513.66				286491	1108450	367.49	1421.84			3284536	7821861	67.0347	159.638			678011	8919637	61.8732	813.979
										131.911			119.427	218.687	337.171				50759	2637995	65.1099	3383.83			6045184	8256233	123.377	168.503			329509	3272976	30.07	298.682
										188.143			220.113	102.512					52735	2739209	67.6446	3513.66			9056239	7316782	184.83	149.329				3221009		293.94
										147.596				106.802						262855		337.171			6463308	10715133	131.911	218.687				1308687		119.427
										99.1477				321.339											9218573	5022861	188.143	102.512				2412016		220.113
										103.103				315.989											7231827	5233048	147.596	106.802
										78.4855				316.919											4857998	15744848	99.1477	321.339
										31.8285				237.909											5051812	15482693	103.103	315.989
										69.7646				263.49											3845600	15528264	78.4855	316.919
										85.0288				270.663											1559521	11656954	31.8285	237.909
										82.9184				55.4148											3418295	12910359	69.7646	263.49
														111.721											4166204	13261822	85.0288	270.663
																									4062800	2715190	82.9184	55.4148
Table Analyzed				Grouped																						5474042		111.721
Column B				Batimastat
vs.				vs.
Column A				Control
Unpaired t test
P value				<0.0001
P value summary				****
Significantly different (P < 0.05)?				Yes
One- or two-tailed P value?				Two-tailed
t, df				t=6.079, df=59
How big is the difference?
Mean of column A				100.7
Mean of column B				457.3
Difference between means (B - A) ± SEM				356.6 ± 58.65
95% confidence interval				239.2 to 473.9
R squared (eta squared)				0.3851
F test to compare variances
F, DFn, Dfd				62.68, 30, 29
P value				<0.0001
P value summary				****
Significantly different (P < 0.05)?				Yes
Data analyzed
Sample size, column A				30
Sample size, column B				31

## Sheet: SourceFig5C
								Normalised data			Raw data
								GFP::Aβ wildtype	GFP::Aβ cri-2 mutant		GFP::Aβ wildtype	GFP::Aβ cri-2 mutant
								71.56	4.26063		675662	40230
								51.57	44.9976		486915	424880
								74.71	33.9773		705475	320823
								134.29	30.4166		1268028	287202
								86.86	52.7994		820122	498546
								63	42.2929		594849	399341
								128.06	49.0879		1209177	463501
								117.9	78.5855		1113229	742026
								357.41	65.2127		3374784	615756
								106.85	68.5378		1008871	647153
								58.05	50.3156		548127	475094
								102.9	55.3645		971637	522767
								40.42	64.7993		381625	611853
								51.77	48.4678		488869	457646
								118.62	75.2776		1120018	710792
								154.17	46.548		1455685	439519
								50.42	66.2065		476076	625140
Table Analyzed				cri-2 intensity 24h 100%				42.12	145.854		397752	1377191
								68.14	143.319		643392	1353257
Column B				GFP::Aβ cri-2(gk314)				138.67	83.5388		1309347	788796
vs.				vs.				82.52			779135
Column A				GFP::Aβ wildtype
Unpaired t test
P value				0.0328
P value summary				*
Significantly different (P < 0.05)?				Yes
One- or two-tailed P value?				Two-tailed
t, df				t=2.213, df=39
How big is the difference?
Mean of column A				100
Mean of column B				62.49
Difference between means (B - A) ± SEM				-37.51 ± 16.95
95% confidence interval				-71.79 to -3.227
R squared (eta squared)				0.1116
F test to compare variances
F, DFn, Dfd				4.173, 20, 19
P value				0.0029
P value summary				**
Significantly different (P < 0.05)?				Yes
Data analyzed
Sample size, column A				21
Sample size, column B				20

## Sheet: SourceFig5D,E
											WT fold change to total EV	EV	GFP	adm-1	adm-2	adt-2	asp-5	asp7/8	csp-2	mig-6	nas-6	nas-8	nas-22	nep-1		WT Median: raw data	L4440 = EV	GFP	adm-1	adm-2	adt-2	asp-5	asp7/8	csp-2	mig-6	nas-6	nas-8	nas-22	nep-1
											JulyRun1-14.07.2020	0	-0.618007	2.24654	2.12593	-0.858812				0.624884	0.415292			0.771534		JulyRun1-14.07.2020	1148290	438638	3727964	3.58947e+06	162125				1865838	1625166			2.03423e+06
											JulyRun2	0	-0.681143	1.27692	0.248775	0.747823				0.339653	0.289654			0.26748		JulyRun2	620894	197976	1413724	775356	1085212				831782	800738			786970
											JulyRun3															JulyRun3
											JulyRun4	0	-0.702081													JulyRun4	2751555	819740
											06.10.2020	0	-0.771738	-0.380156	-0.512871											06.10.2020	1.29564e+06	295744	803092	631143
											16.10.2020	0	-0.323412							0.238917	-0.484578			-0.105267		16.10.2020	3802760	2572900							4.7113e+06	1.96002e+06			3402455
											2020-10-20	0														2020-10-20	2331631
											27.10.2020	0	-0.328824	-0.0755724	-0.152098	-0.116238				0.0527249						27.10.2020	2236968	1501400	2067915	1896730	1976947				2354912
											03.11.2020	0	-0.494242								0.312963			0.315033		03.11.2020	2895710	1464529								3.80196e+06			3.80796e+06
											06.11.2020	0	-0.227138				0.299564				0.42428					06.11.2020	2376977	1837075				3089034				3385480
											10.11.2020	0	-0.596147					-0.315078				-0.585423	-0.592603			10.11.2020	2.28463e+06	922656					1564795				947158	930752
											17.11.2020	0	-0.208776				-0.0603489	0.203787			0.405157	0.121201				17.11.2020	1074957	850532				1.01008e+06	1294019			1510483	1205243
											20.11.2020	0	-0.0791133			-0.399986			-0.315861				0.413527			20.11.2020	959214	883327			575542			656235				1.35587e+06
											24.11.2020	0	-0.354366					0.372274				-0.342333	-0.0982799			24.11.2020	1330028	858711					1825163				874715	1199313
											27.11.2020	0	-0.14311			0.746792	0.415322		0.293174	0.104218	1.16603					2021-11-27	1.92172e+06	1646706			3.35685e+06	2719857		2485123	2122002	4162520
											08.12.2020	0	-0.422993				-0.301272	1.35587			1.47247	0.193145				2021-12-08	1.72529e+06	995503				1.20551e+06	4064547			4265727	2.05852e+06
											Cri-2 mut median: raw data	L4440	GFP	adm-1	adm-2	adt-2	asp-5	asp7/8	csp-2	mig-6	nas-6	nas-8	nas-22	nep-1		Cri-2 mut median: raw data	L4440 = EV	GFP	adm-1	adm-2	adt-2	asp-5	asp7/8	csp-2	mig-6	nas-6	nas-8	nas-22	nep-1
											JulyRun1-14.07.2020															JulyRun1-14.07.2020
											JulyRun2															JulyRun2
											JulyRun3															JulyRun3
											JulyRun4															JulyRun4
											06.10.2020	0	-0.604627	1.21861	0.854474											06.10.2020	440630	174213	977586	817137
											16.10.2020	0	-0.166715							1.33185	-0.225376			0.17881		16.10.2020	2.25215e+06	1.87669e+06							5.25169e+06	1.74457e+06			2.65486e+06
											20.10.2020	0	-0.416854	0.162145	1.35312	0.115974				-0.354365	-0.167063			-0.493172		20.10.2020	3091681	1.8029e+06	3592981	7275082	3.45023e+06				1.9961e+06	2.57517e+06			1.56695e+06
											27.10.2020	0	-0.169579	0.558349	0.0987214	1.06791				0.578816						27.10.2020	1.46087e+06	1.21314e+06	2276551	1605093	3.02095e+06				2306450
											03.11.2020	0	-0.470214								0.00480563			-0.0333738		03.11.2020	2543060	1.34728e+06								2555281			2.45819e+06
											06.11.2020	0	-0.491238				-0.259819				-0.0522549					06.11.2020	4322959	2199359				3199774				4097063
											10.11.2020	0	-0.533435					-0.0272056				-0.00895371	-0.224738			10.11.2020	1.36307e+06	635958					1.32598e+06				1350862	1056733
											17.11.2020	0	0.0574195				-0.811263	-0.228222			-0.77087	-0.253412				17.11.2020	1588372	1.67958e+06				299785	1.22587e+06			363943	1185860
											20.11.2020	0	-0.00980079			-0.136012			-0.363566				-0.296974			20.11.2020	783814	776132			677206			498846				551042
											24.11.2020	0	-0.244638					0.00182042				0.765305	0.253892			24.11.2020	650675	491495					651860				1148640	815876
											27.11.2020	0	-0.521343			0.316934	-0.232656		-0.335055	0.547914	-0.236082					2021-11-27	3.21749e+06	1540073			4237220	2.46892e+06		2139452	4980393	2457898
											08.12.2020	0	-0.736744				-0.71722	-0.692302			-0.493112	-0.640479				2021-12-08	4527682	1191939				1280337	1393157			2295027	1627799
