# Supplementary material for: Removal of extracellular human amyloid beta aggregates by extracellular proteases in C. elegans
Source: eLife. 2023 Sep 20;12:e83465. doi: 10.7554/eLife.83465 (PMC10541181; doi:10.7554/eLife.83465)
Supplement: Figure 6—source data 1. — Individual measurements, independent biological trials, raw and processed data, and statistics are provided. [file elife-83465-fig6-data1.xlsx]

## Sheet: SourceFig6A
								raw data measured as intensity per number of pixels
								Aβ wildtype				cri-2 mut				adm-2 mut				cri-2/adm-2 mut
								14.01.2022	11.11.2021	29.10.2021	05.02.2021	14.01.2022	11.11.2021	29.10.2021	05.02.2021	14.01.2022	11.11.2021	29.10.2021	05.02.2021	14.01.2022	11.11.2021	29.10.2021	05.02.2021
								40.964	26.383	36.485	33.334	31.517	32.202	31.569	21.149	61.865	42.732	31.883	37.077	33.066	35.358	36.027	74.973
								34.965	52.371	36.407	26.098	33.619	33.086	30.849	52.404	57.823	35.687	50.678	57.511	28.596	32.846	38.992	36.521
								34.334	58.034	25.893	35.212	36.173	38.958	34.903	30.487	62.285	36.923	39.486	65.353	36.664	32.846	38.059	61.414
								37.53	43.109	30.046	29.217	38.001	30.994	30.51	20.708	43.219	39.76	34.188	63.778	42.267	47.099	39.329	53.959
								40.65	51.083	31.682	30.081	30.679	42.797	35.545	26.498	45.015	46.153	34.554	60.74	44.111	31.193	31.105	95.334
								62.342	41.191	36.036	27.14	33.829	39.313	35.841	29.971	72.172	52.01	41.254	70.334	43.863	34.826	26.049	95.545
								28.506	33.77	38.487	27.552	42.418	30.025	33.057	22.129	60.726	52.01	53.918	31.893	46.379	33.757	35.495	81.474
								43.611	32.106	39.17	25.465	33.5	32.404	26.409	30.192	53.428	41.181	37.076	49.255	40.458	31.982	33.546	54.527
								56.175	27.53	50.456	25.672	29.975	31.881	31.505	46.577	41.275	48.731	40.352	39.273	37.464	31.617	32.621	73.397
								44.833	30.957	34.347	30.981	44.231	34.644	34.111	26.331	76.495	36.662	31.387	34.803	36.696	34.51	29.987	53.307
								40.625	35.938	48.368	35.183	51.272	33.976	40.171	41.833	40.225	43.253	33.975	30.609	35.985	51.655	31.934	39.535
								55.694	35.868	32.21	32.369	31.503	45.089	34.187	32.023	39.885	41.814	32.751	50.129	32.36	45.551	31.09	61.612
								55.032	35.689	32.821	29.146	28.824	32.638	38.908	63.521	50.69	34.963	41.473	51.171	34.615	42.571	44.229	48.453
								38.56	33.694	33.035	33.069	29.831	28.487	37.222	39.235	43.168	35.278	65.566	61.11	36.816	32.752	31.419	38.679
								32.887	35.887	58.315	35.025	30.743	33.341	35.886	53.999	31.224	53.079	39.571	58.452	40.422	40.127	32.289	48
								43.284	38.77	47.329	32.681	31.816	30.334	33.807	36.821	41.121	36.499	29.618	55.102	28.465	40.517	54.605	56.675
								37.975	48.065	47.398	29.287	35.754	29.765	34.917	19.196	40.234	36.499	46.486	76.409	41.608	40.964	45.295	39.793
								39.853	20.318	42.033	30.583	36.012	29.71	42.816	36.425	66.487	36.499	35.9	56.868	41.783	37.752	55.03	41.194
								30.024	43.144	27.54	33.123	33.688	41.923	23.692	41.867	53.891	45.984	40.327	50.287	44.725	36.032	40.225	71.067
								55.285	39.667	28.59	35.201	32.914	28.562	28.923	24.763	48.528	41.139	34.568	33.395	41.618	38.385	35.208	39.099
								39.955	42.067	78.491		33.279	36.19	29.596		51.31	30.678	43.089	34.14	28.6	33.73	48.702
								36.082	45.154	33.25		37.696	31.122	63.911		39.355	40.506	35.012		30.535	35.644	38.924
								50.151	44.123	29.453		31.508	43.225	23.011		54.445	57.102	30.524		33.353	37.805	38.916
Table Analyzed		4columns						67.68	34.965	35.82		33.241	37.963	35.846		91.945	47.847	52.282		40.954	33.888	33.434
								44.435	41.561	43.629		34.026	44.102	37.025		59.75	40.164	33.679			42.888	36.156
Two-way ANOVA		Ordinary						32.423	53.858	35.865		40.333	29.818	29.44		58.886	37.149	51.672			40.877	40.355
Alpha		0.05						41.676	37.082	48.511		31.814	32.534	21.213		59.843	43.837	35.403			42.625	33.522
								35.939	35.583	53.378		30.612	28.348	26.715		50.623	34.974	43.335			36.167	35.131
Source of Variation		% of total variation	P value	P value summary	Significant?			40.175	35.449	29.29			31.164	45.02			32.214	35.203			37.951	33.237
Row Factor		3.434	0.9628	ns	No			30.555	50.553	35.384			34.835	23.252			32.202	41.807			36.555	30.268
Column Factor		26.59	<0.0001	****	Yes				26.688	60.305			30.231	33.983			35.503	32.976			36.814	22.813
									32.514	44.409			37.772				34.74	41.032			45.851	26.075
ANOVA table		SS (Type III)	DF	MS	F (DFn, DFd)	P value			40.814	49.645			46.205				36.116	39.044			31.561	29.122
Row Factor		2604	38	68.53	F (38, 483) = 0.6236	P=0.9628			54.157	29.196								40.629			30.718	33.827
Column Factor		20163	4	5041	F (4, 483) = 45.87	P<0.0001				38.228											39.15
Residual		53078	483	109.9						41.019
										54.129
Data summary										33.943
Number of columns (Column Factor)		5								27.725
Number of rows (Row Factor)		39
Number of values		526
Compare column means (main column effect)
Number of families		1
Number of comparisons per family		10
Alpha		0.05
Tukey's multiple comparisons test	Mean Diff.	95.00% CI of diff.	Below threshold?	Summary	Adjusted P Value
Aβ(F20S;L35P) vs. Aβ wildtype	-14.71	-19.23 to -10.19	Yes	****	<0.0001
Aβ(F20S;L35P) vs. cri-2(gk314)	-10.11	-14.68 to -5.539	Yes	****	<0.0001
Aβ(F20S;L35P) vs. adm-2(ok3178)	-21.04	-25.58 to -16.51	Yes	****	<0.0001
Aβ(F20S;L35P) vs. cri-2(gk314) adm-2(ok3178)	-16.48	-21.04 to -11.92	Yes	****	<0.0001
Aβ wildtype vs. cri-2(gk314)	4.606	0.8147 to 8.398	Yes	**	0.0084
Aβ wildtype vs. adm-2(ok3178)	-6.331	-10.08 to -2.578	Yes	****	<0.0001
Aβ wildtype vs. cri-2(gk314) adm-2(ok3178)	-1.768	-5.543 to 2.007	No	ns	0.7023
cri-2(gk314) vs. adm-2(ok3178)	-10.94	-14.74 to -7.131	Yes	****	<0.0001
cri-2(gk314) vs. cri-2(gk314) adm-2(ok3178)	-6.374	-10.22 to -2.531	Yes	****	<0.0001
adm-2(ok3178) vs. cri-2(gk314) adm-2(ok3178)	4.563	0.7605 to 8.366	Yes	**	0.0096
Test details	Mean 1	Mean 2	Mean Diff.	SE of diff.	N1	N2	q	DF
Aβ(F20S;L35P) vs. Aβ wildtype	24.07	38.78	-14.71	1.651	62	123	12.61	483
Aβ(F20S;L35P) vs. cri-2(gk314)	24.07	34.17	-10.11	1.668	62	112	8.568	483
Aβ(F20S;L35P) vs. adm-2(ok3178)	24.07	45.11	-21.04	1.657	62	116	17.96	483
Aβ(F20S;L35P) vs. cri-2(gk314) adm-2(ok3178)	24.07	40.55	-16.48	1.665	62	113	14	483
Aβ wildtype vs. cri-2(gk314)	38.78	34.17	4.606	1.385	123	112	4.704	483
Aβ wildtype vs. adm-2(ok3178)	38.78	45.11	-6.331	1.37	123	116	6.533	483
Aβ wildtype vs. cri-2(gk314) adm-2(ok3178)	38.78	40.55	-1.768	1.379	123	113	1.813	483
cri-2(gk314) vs. adm-2(ok3178)	34.17	45.11	-10.94	1.39	112	116	11.13	483
cri-2(gk314) vs. cri-2(gk314) adm-2(ok3178)	34.17	40.55	-6.374	1.404	112	113	6.422	483
adm-2(ok3178) vs. cri-2(gk314) adm-2(ok3178)	45.11	40.55	4.563	1.389	116	113	4.647	483

## Sheet: SourceFig6B,C
Flower							Moss							Raw data per date
														2022-02-22	total count: yes or no aggregate per worm						percentage of counted animals with aggregates
															moss	no moss	flower	no flower	n		moss	no moss	flower	no flower
														Aβ wildtype	19	2	13	8	21		90.4762	9.52381	61.9048	38.0952
														cri-2(gk314)	2	23	0	25	25		8	92	0	100
														adm-2(ok3178)	22	2	17	7	24		91.6667	8.33333	70.8333	29.1667
														cri-2(gk314) / adm-2(ok3178)	18	2	15	5	20		90	10	75	25
														2022-02-04	total count: yes or no aggregate per worm						percentage of counted animals with aggregates
															moss	no moss	flower	no flower	n		moss	no moss	flower	no flower
														Aβ wildtype	22	3	21	4	25		88	12	84	16
														cri-2(gk314)	19	7	18	8	26		73.0769	26.9231	69.2308	30.7692
														adm-2(ok3178)	26	0	24	2	26		100	0	92.3077	7.69231
														cri-2(gk314) / adm-2(ok3178)	20	0	19	1	20		100	0	95	5
														2022-04-01	total count: yes or no aggregate per worm						percentage of counted animals with aggregates
															moss	no moss	flower	no flower	n		moss	no moss	flower	no flower
														Aβ wildtype	28	2	25	5	30		93.3333	6.66667	83.3333	16.6667
														cri-2(gk314)	21	7	6	22	28		75	25	21.4286	78.5714
														adm-2(ok3178)	29	0	25	4	29		100	0	86.2069	13.7931
Flower	Aβ wildtype	cri-2(gk314)	adm-2(ok3178)	cri-2(gk314) / adm-2(ok3178)		Moss	Aβ wildtype	cri-2(gk314)	adm-2(ok3178)	cri-2(gk314) / adm-2(ok3178)				cri-2(gk314) / adm-2(ok3178)	27	2	26	3	29		93.1034	6.89655	89.6552	10.3448
2022-02-22	61.9	0	70.83	75		2022-02-22	90.48	8	91.67	90
2022-02-04	84	69	92	95		2022-02-04	88	73	100	100				2022-04-02	total count: yes or no aggregate per worm						percentage of counted animals with aggregates
2022-04-01	83.33	21.43	86.21	89.66		2022-04-01	93.33	75	100	75.86					moss	no moss	flower	no flower	n		moss	no moss	flower	no flower
2022-04-02	80.95	37.5	100	59.26		2022-04-02	90.48	75	100	93.1				Aβ wildtype	19	2	17	4	21		90.4762	9.52381	80.9524	19.0476
2022-07-06	90.32	44.44	70.97	91.43		2022-07-06	100	66.67	93.55	100				cri-2(gk314)	18	6	9	15	24		75	25	37.5	62.5
														adm-2(ok3178)	28	0	28	0	28		100	0	100	0
														cri-2(gk314) / adm-2(ok3178)	21	6	16	11	27		77.7778	22.2222	59.2593	40.7407
Table Analyzed		Flower					Table Analyzed		Moss					2022-07-06	total count: yes or no aggregate per worm						percentage of counted animals with aggregates
Data sets analyzed		A-D					Data sets analyzed		A-D						moss	no moss	flower	no flower	n		moss	no moss	flower	no flower
														Aβ wildtype	31	0	28	3	31		100	0	90.3226	9.67742
ANOVA summary							ANOVA summary							cri-2(gk314)	24	6	13	17	30		80	20	43.3333	56.6667
F		10.47					F		5					adm-2(ok3178)	32	0	25	7	32		100	0	78.125	21.875
P value		0.0005					P value		0.0124					cri-2(gk314) / adm-2(ok3178)	30	0	26	4	30		100	0	86.6667	13.3333
P value summary		***					P value summary		*
Significant diff. among means (P < 0.05)?		Yes					Significant diff. among means (P < 0.05)?		Yes
R squared		0.6626					R squared		0.4839
Brown-Forsythe test							Brown-Forsythe test
F (DFn, DFd)		1.086 (3, 16)					F (DFn, DFd)		0.7537 (3, 16)
P value		0.3834					P value		0.5361
P value summary		ns					P value summary		ns
Are SDs significantly different (P < 0.05)?		No					Are SDs significantly different (P < 0.05)?		No
Bartlett's test							Bartlett's test
Bartlett's statistic (corrected)		3.884					Bartlett's statistic (corrected)		18.85
P value		0.2743					P value		0.0003
P value summary		ns					P value summary		***
Are SDs significantly different (P < 0.05)?		No					Are SDs significantly different (P < 0.05)?		Yes
ANOVA table		SS	DF	MS	F (DFn, DFd)	P value	ANOVA table		SS	DF	MS	F (DFn, DFd)	P value
Treatment (between columns)		8708	3	2903	F (3, 16) = 10.47	P=0.0005	Treatment (between columns)		3968	3	1323	F (3, 16) = 5.000	P=0.0124
Residual (within columns)		4434	16	277.1			Residual (within columns)		4233	16	264.6
Total		13142	19				Total		8201	19
Data summary							Data summary
Number of treatments (columns)		4					Number of treatments (columns)		4
Number of values (total)		20					Number of values (total)		20
Number of families		1					Number of families		1
Number of comparisons per family		6					Number of comparisons per family		6
Alpha		0.05					Alpha		0.05
Tukey's multiple comparisons test	Mean Diff.	95.00% CI of diff.	Below threshold?	Summary	Adjusted P Value		Tukey's multiple comparisons test	Mean Diff.	95.00% CI of diff.	Below threshold?	Summary	Adjusted P Value
Aβ wildtype vs. cri-2(gk314)	45.85	15.72 to 75.97	Yes	**	0.0025	A-B	Aβ wildtype vs. cri-2(gk314)	30.26	0.8258 to 59.69	Yes	*	0.0428	A-B
Aβ wildtype vs. adm-2(ok3178)	-5.334	-35.46 to 24.79	No	ns	0.9563	A-C	Aβ wildtype vs. adm-2(ok3178)	-5.876	-35.31 to 23.56	No	ns	0.9392	A-C
Aβ wildtype vs. cri-2(gk314) adm-2(ok3178)	-1.018	-31.14 to 29.11	No	ns	0.9997	A-D	Aβ wildtype vs. cri-2(gk314) adm-2(ok3178)	0.666	-28.77 to 30.10	No	ns	0.9999	A-D
cri-2(gk314) vs. adm-2(ok3178)	-51.18	-81.31 to -21.06	Yes	***	0.0009	B-C	cri-2(gk314) vs. adm-2(ok3178)	-36.13	-65.57 to -6.702	Yes	*	0.0138	B-C
cri-2(gk314) vs. cri-2(gk314) adm-2(ok3178)	-46.87	-76.99 to -16.74	Yes	**	0.002	B-D	cri-2(gk314) vs. cri-2(gk314) adm-2(ok3178)	-29.59	-59.02 to -0.1598	Yes	*	0.0485	B-D
adm-2(ok3178) vs. cri-2(gk314) adm-2(ok3178)	4.316	-25.81 to 34.44	No	ns	0.976	C-D	adm-2(ok3178) vs. cri-2(gk314) adm-2(ok3178)	6.542	-22.89 to 35.97	No	ns	0.9189	C-D
Test details	Mean 1	Mean 2	Mean Diff.	SE of diff.	n1	n2	Test details	Mean 1	Mean 2	Mean Diff.	SE of diff.	n1	n2	q	DF
Aβ wildtype vs. cri-2(gk314)	80.1	34.25	45.85	10.53	5	5	Aβ wildtype vs. cri-2(gk314)	92.46	62.2	30.26	10.29	5	5	4.16	16
Aβ wildtype vs. adm-2(ok3178)	80.1	85.43	-5.334	10.53	5	5	Aβ wildtype vs. adm-2(ok3178)	92.46	98.33	-5.876	10.29	5	5	0.8078	16
Aβ wildtype vs. cri-2(gk314) adm-2(ok3178)	80.1	81.12	-1.018	10.53	5	5	Aβ wildtype vs. cri-2(gk314) adm-2(ok3178)	92.46	91.79	0.666	10.29	5	5	0.09156	16
cri-2(gk314) vs. adm-2(ok3178)	34.25	85.43	-51.18	10.53	5	5	cri-2(gk314) vs. adm-2(ok3178)	62.2	98.33	-36.13	10.29	5	5	4.967	16
cri-2(gk314) vs. cri-2(gk314) adm-2(ok3178)	34.25	81.12	-46.87	10.53	5	5	cri-2(gk314) vs. cri-2(gk314) adm-2(ok3178)	62.2	91.79	-29.59	10.29	5	5	4.068	16
adm-2(ok3178) vs. cri-2(gk314) adm-2(ok3178)	85.43	81.12	4.316	10.53	5	5	adm-2(ok3178) vs. cri-2(gk314) adm-2(ok3178)	98.33	91.79	6.542	10.29	5	5	0.8993	16

## Sheet: SourceFig6E,F
		Intensity					Count					Moss								Flower
												Name image (2=LSD2104, 2+18=LSD3014)	Count	Total Area	Average Size	%Area	Mean	IntDen		Name image (2=LSD2104, 2+18=LSD3014)	Count	Total Area	Average Size	%Area	Mean	IntDen
												2 1_0002_C001T001-M1.tif	25	454	18.16	0.043	255	4630.8		2 1_0001_C001T001-F1.tif	125	9440	75.52	0.9	255	19257.6
												2 1_0002_C001T001-M2.tif	28	470	16.786	0.045	255	4280.36		2 1_0001_C001T001-F2.tif	126	8775	69.643	0.837	255	17758.9
												2 10_0002_C001T001-M1.tif	33	1100	33.333	0.105	255	8500		2 10_0001_C001T001-F1.tif	15	310	20.667	0.03	255	5270
												2 10_0002_C001T001-M2.tif	19	698	36.737	0.067	255	9367.9		2 10_0001_C001T001-F2.tif	17	328	19.294	0.031	255	4920
												2 11_0003_C001T001-M1.tif	20	404	20.2	0.039	255	5151		2 11_0001_C001T001-F1.tif	18	484	26.889	0.046	255	6856.67
												2 11_0003_C001T001-M2.tif	20	875	43.75	0.083	255	11156.2		2 11_0001_C001T001-F2.tif	2	34	17	0.003	255	4335
												2 12_0003_C001T001-M1.tif	16	683	42.688	0.065	255	10885.3		2 12_0001_C001T001-F1.tif	25	465	18.6	0.044	255	4743
												2 12_0003_C001T001-M2.tif	22	404	18.364	0.039	255	4682.73		2 12_0001_C001T001-F2.tif	47	1534	32.638	0.146	255	8322.77
												2 13_0003_C001T001-M1.tif	8	45	5.625	0.004	255	1434.38		2 13_0002_C001T001-F1.tif	16	275	17.188	0.026	255	4382.81
												2 13_0003_C001T001-M2.tif	2	17	8.5	0.002	255	2167.5		2 13_0002_C001T001-F2.tif	21	223	10.619	0.021	255	2707.86
												2 14_0003_C001T001-M1.tif	39	1622	41.59	0.155	255	10605.4		2 14_0001_C001T001-F1.tif	17	1145	67.353	0.109	255	17175
												2 14_0003_C001T001-M2.tif	39	1622	41.59	0.155	255	10605.4		2 14_0001_C001T001-F2.tif	11	513	46.636	0.049	255	11892.3
												2 15_C001T001-M1.tif	7	54	7.714	0.005	255	1967.14		2 15_C001T001-F1.tif	15	520	34.667	0.05	255	8840
												2 15_C001T001-M2.tif	15	192	12.8	0.018	255	3264		2 15_C001T001-F2.tif	8	58	7.25	0.006	255	1848.75
												2 17_0001_C001T001-M1.tif	30	894	29.8	0.085	255	7599		2 16_0001_C001T001-F1.tif	46	1791	38.935	0.171	255	9928.37
												2 17_0001_C001T001-M2.tif	36	624	17.333	0.06	255	4420		2 16_0001_C001T001-F2.tif	59	3355	56.864	0.32	255	14500.4
Table Analyzed		intensity ADM-2oe aggregates Moss				Table Analyzed		intensity ADM-2oe aggregates Flower				2 18_0005_C001T001-M1.tif	21	1158	55.143	0.11	255	14061.4		2 16_0003_C001T001-F1.tif	44	6947	157.886	0.663	255	40261
												2 18_0005_C001T001-M2.tif	22	1358	61.727	0.13	255	15740.5		2 16_0003_C001T001-F2.tif	29	10649	367.207	1.016	255	93637.8
Column B			ADM-2 oe			Column B			ADM-2 oe			2 19_0002_C001T001-M1.tif	66	3999	60.591	0.381	255	15450.7		2 17_C001T001-F1.tif	78	5048	64.718	0.481	255	16503.1
vs.			vs.			vs.			vs.			2 19_0002_C001T001-M2.tif	62	5427	87.532	0.518	255	22320.7		2 17_C001T001-F2.tif	68	6647	97.75	0.634	255	24926.2
Column A			wt Aβ			Column A			wt Aβ			2 2_0001_C001T001-M1.tif	25	1678	67.12	0.16	255	17115.6		2 18_0001_C001T001-F1.tif	61	4431	72.639	0.423	255	18523
												2 20_0005_C001T001-M1.tif	34	3543	104.206	0.338	255	26572.5		2 18_0001_C001T001-F2.tif	45	4237	94.156	0.404	255	24009.7
Unpaired t test						Unpaired t test						2 20_0005_C001T001-M2.tif	32	2162	67.562	0.206	255	17228.4		2 19_0001_C001T001-F1.tif	68	6998	102.912	0.667	255	26242.5
P value			0.0003			P value			0.0194			2 21_0001_C001T001-M2.tif	23	1567	68.13	0.149	255	17373.3		2 19_0001_C001T001-F2.tif	102	7993	78.363	0.762	255	19982.5
P value summary			***			P value summary			*			2 21_0002_C001T001-M1.tif	33	2850	86.364	0.272	255	22022.7		2 2_C001T001-F1.tif	80	8889	111.112	0.848	255	28333.7
Significantly different (P < 0.05)?			Yes			Significantly different (P < 0.05)?			Yes			2 22_0002_C001T001-M1.tif	21	1580	75.238	0.151	255	19185.7		2 2_C001T001-F2.tif	74	11361	153.527	1.083	255	39149.4
One- or two-tailed P value?			Two-tailed			One- or two-tailed P value?			Two-tailed			2 22_0002_C001T001-M2.tif	30	1212	40.4	0.116	255	10302		2 20_0001_C001T001-F1.tif	39	3287	84.282	0.313	255	21491.9
t, df			t=3.782, df=74			t, df			t=2.382, df=86			2 3_0002_C001T001-M1.tif	42	1790	42.619	0.171	255	10867.9		2 20_0001_C001T001-F2.tif	58	4183	72.121	0.399	255	18390.8
												2 3_0002_C001T001-M2.tif	51	3291	64.529	0.314	255	16455		2 21_C001T001-F1.tif	31	3918	126.387	0.374	255	32228.7
How big is the difference?						How big is the difference?						2 4_0002_C001T001-M1.tif	33	2836	85.939	0.27	255	21914.5		2 21_C001T001-F2.tif	28	1532	54.714	0.146	255	13952.1
Mean of column A			11658			Mean of column A			15930			2 4_0002_C001T001-M2.tif	32	2079	64.969	0.198	255	16567		2 22_C001T001-F1.tif	61	5717	93.721	0.545	255	23898.9
Mean of column B			4826			Mean of column B			8410			2 5_0001_C001T001-M1.tif	25	1353	54.12	0.129	255	13800.6		2 22_C001T001-F2.tif	48	5470	113.958	0.522	255	29059.4
Difference between means (B - A) ± SEM			-6832 ± 1807			Difference between means (B - A) ± SEM			-7520 ± 3158			2 5_0001_C001T001-M2.tif	31	1398	45.097	0.133	255	11499.7		2 3_C001T001-F1.tif	83	3863	46.542	0.368	255	11868.3
95% confidence interval			-10432 to -3232			95% confidence interval			-13798 to -1243			2 6_0003_C001T001-M1.tif	35	959	27.4	0.091	255	6987		2 3_C001T001-F2.tif	62	2188	35.29	0.209	255	8999.03
R squared (eta squared)			0.162			R squared (eta squared)			0.06187			2 6_0003_C001T001-M2.tif	21	586	27.905	0.056	255	7115.71		2 4_0001_C001T001-F1.tif	22	1008	45.818	0.096	255	11683.6
												2 7_0003_C001T001-M1.tif	17	375	22.059	0.036	255	5625		2 4_0001_C001T001-F2.tif	33	796	24.121	0.076	255	6150.91
F test to compare variances						F test to compare variances						2 7_0003_C001T001-M2.tif	32	1019	31.844	0.097	255	8120.16		2 5_C001T001-F1.tif	63	4080	64.762	0.389	255	16514.3
F, DFn, Dfd			2.081, 35, 39			F, DFn, Dfd			1.171, 45, 41			2 8_0002_C001T001-M1.tif	25	1529	61.16	0.146	255	15595.8		2 5_C001T001-F2.tif	41	1932	47.122	0.184	255	12016.1
P value			0.0274			P value			0.6105			2 8_0002_C001T001-M2.tif	31	2236	72.129	0.213	255	18392.9		2 6_0002_C001T001-F1.tif	50	1569	31.38	0.15	255	8001.9
P value summary			*			P value summary			ns			2 9_0003_C001T001_M2.tif	39	2336	59.897	0.223	255	15273.8		2 6_0002_C001T001-F2.tif	43	1005	23.372	0.096	255	5959.88
Significantly different (P < 0.05)?			Yes			Significantly different (P < 0.05)?			No			2+18 1_0002_C001T001-M1.tif	0	0	0	0	0	0		2 7_0001_C001T001-F1.tif	36	464	12.889	0.044	255	3286.67
												2+18 1_0002_C001T001-M2.tif	0	0	0	0	0	0		2 7_0001_C001T001-F2.tif	20	216	10.8	0.021	255	2754
Data analyzed						Data analyzed						2+18 10_0001_C001T001-M1.tif	0	0	0	0	0	0		2 8_0002_C001T001-F1.tif	2	6	3	0.0005722	255	765
Sample size, column A			40			Sample size, column A			46			2+18 10_0001_C001T001-M2.tif	0	0	0	0	0	0		2 8_0002_C001T001-F2.tif	0	0	0	0	0	0
Sample size, column B			36			Sample size, column B			42			2+18 11_0001_C001T001-M1.tif	1	1	1	9.537e-05	255	255		2 9_C001T001_F1.tif	88	6285	71.42	0.599	255	18212.2
												2+18 11_0001_C001T001-M2.tif	0	0	0	0	0	0		2 9_C001T001-F2.tif	81	4212	52	0.402	255	13260
												2+18 12_0001_C001T001-M1.tif	0	0	0	0	0	0		2+18 20_C001T001-F2.tif	1	8	8	0.0007629	255	2040
Table Analyzed		count ADM-2oe aggregates Moss				Table Analyzed		count ADM-2oe aggregates Flower				2+18 12_0001_C001T001-M2.tif	0	0	0	0	0	0		2+18 20_C001T001-F1.tif	1	11	11	0.001	255	2805
												2+18 13_0001_C001T001-M1.tif	21	816	38.857	0.078	255	9908.57		2+18 19_C001T001-F2.tif	34	1525	44.853	0.145	255	11437.5
Column B			ADM-2 oe			Column B			ADM-2 oe			2+18 13_0001_C001T001-M2.tif	7	452	64.571	0.043	255	16465.7		2+18 19_C001T001-F1.tif	31	1029	33.194	0.098	255	8464.35
vs.			vs.			vs.			vs.			2+18 14_0002_C001T001-M1.tif	0	0	0	0	0	0		2+18 18_C001T001-F2.tif	0	0	0	0	0	0
Column A			wt Aβ			Column A			wt Aβ			2+18 14_0002_C001T001-M2.tif	0	0	0	0	0	0		2+18 18_C001T001-F1.tif	1	22	22	0.002	255	5610
												2+18 15_0001_C001T001-M1.tif	23	851	37	0.081	255	9435		2+18 17_C001T001-F1.tif	35	1923	54.943	0.183	255	14010.4
Unpaired t test						Unpaired t test						2+18 15_0001_C001T001-M2.tif	15	672	44.8	0.064	255	11424		2+18 17_C001T001-F2.tif	17	981	57.706	0.094	255	14715
P value			<0.0001			P value			<0.0001			2+18 16_0001_C001T001-M1.tif	0	0	0	0	0	0		2+18 16_C001T001-F2.tif	0	0	0	0	0	0
P value summary			****			P value summary			****			2+18 16_0001_C001T001-M2.tif	0	0	0	0	0	0		2+18 16_C001T001-F1.tif	5	44	8.8	0.004	255	2244
Significantly different (P < 0.05)?			Yes			Significantly different (P < 0.05)?			Yes			2+18 17_0001_C001T001-M1.tif	26	5007	192.577	0.478	255	49107.1		2+18 15_C001T001-F2.tif	0	0	0	0	0	0
One- or two-tailed P value?			Two-tailed			One- or two-tailed P value?			Two-tailed			2+18 17_0002_C001T001-M2.tif	35	1056	30.171	0.101	255	7693.71		2+18 15_C001T001-F1.tif	0	0	0	0	0	0
t, df			t=6.526, df=74			t, df			t=6.237, df=86			2+18 18_0002_C001T001-M1.tif	4	55	13.75	0.005	255	3506.25		2+18 14_0001_C001T001-F2.tif	2	26	13	0.002	255	3315
												2+18 18_0002_C001T001-M2.tif	3	50	16.667	0.005	255	4250		2+18 14_0001_C001T001-F1.tif	2	31	15.5	0.003	255	3952.5
How big is the difference?						How big is the difference?						2+18 19_0001_C001T001-M1.tif	16	126	7.875	0.012	255	2008.12		2+18 13_C001T001-F1.tif	0	0	0	0	0	0
Mean of column A			28.55			Mean of column A			45.78			2+18 19_0001_C001T001-M2.tif	21	134	6.381	0.013	255	1627.14		2+18 13_C001T001-F2.tif	0	0	0	0	0	0
Mean of column B			9.333			Mean of column B			12.02			2+18 2_0001_C001T001-M1.tif	0	0	0	0	0	0		2+18 12_C001T001-F2.tif	2	41	20.5	0.004	255	5227.5
Difference between means (B - A) ± SEM			-19.22 ± 2.944			Difference between means (B - A) ± SEM			-33.76 ± 5.413			2+18 2_0001_C001T001-M2.tif	4	70	17.5	0.007	255	4462.5		2+18 12_C001T001-F1.tif	2	23	11.5	0.002	255	2932.5
95% confidence interval			-25.08 to -13.35			95% confidence interval			-44.52 to -23.00			2+18 20_0001_C001T001-M1.tif	13	153	11.769	0.015	255	3001.15		2+18 11_C001T001-F2.tif	13	257	19.769	0.025	255	5041.15
R squared (eta squared)			0.3653			R squared (eta squared)			0.3115			2+18 20_0001_C001T001-M2.tif	15	144	9.6	0.014	255	2448		2+18 11_C001T001-F1.tif	12	319	26.583	0.03	255	6778.75
												2+18 3_0001_C001T001-M1.tif	0	0	0	0	0	0		2+18 10_C001T001-F2.tif	0	0	0	0	0	0
F test to compare variances						F test to compare variances						2+18 3_0001_C001T001-M2.tif	0	0	0	0	0	0		2+18 10_C001T001-F1.tif	0	0	0	0	0	0
F, DFn, Dfd			1.002, 39, 35			F, DFn, Dfd			3.133, 45, 41			2+18 6_0002_C001T001-M1.tif	36	3133	87.028	0.299	255	22192.1		2+18 9_C001T001-F2.tif	5	92	18.4	0.009	255	4692
P value			0.9989			P value			0.0003			2+18 6_0002_C001T001-M2.tif	38	1368	36	0.13	255	9180		2+18 9_C001T001-F1.tif	7	77	11	0.007	255	2805
P value summary			ns			P value summary			***			2+18 7_0001_C001T001-M1.tif	40	1324	33.1	0.126	255	8440.5		2+18 8_C001T001-F2.tif	20	740	37	0.071	255	9435
Significantly different (P < 0.05)?			No			Significantly different (P < 0.05)?			Yes			2+18 7_0001_C001T001-M2.tif	16	354	22.125	0.034	255	5641.88		2+18 8_C001T001-F1.tif	12	1329	110.75	0.127	255	28241.2
												2+18 8_0001_C001T001-M1.tif	2	21	10.5	0.002	255	2677.5		2+18 7_C001T001-F2.tif	81	7038	86.889	0.671	255	22156.7
Data analyzed						Data analyzed						2+18 8_0001_C001T001-M2.tif	0	0	0	0	0	0		2+18 7_C001T001-F1.tif	52	16433	316.019	1.567	255	80584.9
Sample size, column A			40			Sample size, column A			46			2+18 9_0001_C001T001-M1.tif	0	0	0	0	0	0		2+18 6_0001_C001T001-F1.tif	37	4620	124.865	0.441	255	31840.5
Sample size, column B			36			Sample size, column B			42			2+18 9_0001_C001T001-M2.tif	0	0	0	0	0	0		2+18 6_0001_C001T001-F2.tif	30	3530	117.667	0.337	255	30005
																				2+18 4_0001_C001T001-F4.tif	26	845	32.5	0.081	255	8287.5
																				2+18 4_0001_C001T001-F3.tif	25	938	37.52	0.089	255	9567.6
																				2+18 4_C001T001-F2.tif	17	554	32.588	0.053	255	8310
																				2+18 4_C001T001-F1.tif	28	1929	68.893	0.184	255	17567.7
																				2+18 3_0001_C001T001-F2.tif	0	0	0	0	0	0
																				2+18 3_0001_C001T001-F1.tif	0	0	0	0	0	0
																				2+18 2_C001T001-F2.tif	0	0	0	0	0	0
																				2+18 2_C001T001-F1.tif	0	0	0	0	0	0
																				2+18 1_C001T001-F2.tif	4	105	26.25	0.01	255	6693.75
																				2+18 1_C001T001-F1.tif	0	0	0	0	0	0
																				2+18 1_0001_C001T001-F2.tif	2	11	5.5	0.001	255	1402.5
																				2+18 1_0001_C001T001-F1.tif	1	12	12	0.001	255	3060
