# Supplementary material for: Removal of extracellular human amyloid beta aggregates by extracellular proteases in C. elegans
Source: eLife journal article supplement (doi:10.7554/elife.83465), 2023-09-20
Supplement: supp [file elife-83465-supp-v1.zip]

## Sheet: SupplementaryFig1.1
											UnCropped Blots
