# Supplementary material for: Removal of extracellular human amyloid beta aggregates by extracellular proteases in C. elegans
Source: eLife. 2023 Sep 20;12:e83465. doi: 10.7554/eLife.83465 (PMC10541181; doi:10.7554/eLife.83465)
Supplement: Supplementary file 2. — Individual measurements, independent biological trials, raw and processed data, and statistics are provided. [file elife-83465-supp2.xlsx]

## Sheet: Sheet1
Category 1					Category 2					Category 3					Category 4
ProteinHomeostasis E.g. ubiquitin, apoptosis. (no follow-up)					Expected hits, that are hits (AD relevance)					Interesting hits, but not followed up (e.g. SNAREs)					Interesting hits, followed up (e.g. MMPs)
C. elegans		Human ortholog	GFP intensity		C. elegans		Human ortholog	GFP intensity		C. elegans		Human ortholog	GFP intensity		C. elegans		Human ortholog	GFP intensity
sequence	gene name	name	%up	% down	sequence	gene name	name	up/n obs.	down/n obs.	sequence	gene name	name	up/n obs.	down/n obs.	sequence	gene name	name	up/n obs.	down/n obs.
K06A1.5	atg-16.2	ATG16L1	33.3333	0	F31B12.1	plc-1	PLCE1	7/10	0	C35A11.4	C35A11.4	SLC2A1,3,4,5,7,9,11,14	3/12	3/12	C04A11.4	adm-2	ADAM9	7/10	0/10
B0336.8	lgg-3	ATG12	11.1111	11.1111	ZK697.8	ZK697.8	TTR	7/10	0	W03C9.3	rab-7	RAB7A	4/6	0/6	F08C6.1	adt-2	ADAMTS family	0/6	2/6
M7.5	atg-7	ATG7	11.1111	11.1111	C04A11.4	adm-2	ADAM9	7/10	0	C07G1.5	hgrs-1	HGS	4/6	0/6	K07C11.5	cri-2	TIMP	1/12	6/12
Y87G2A.3	atg-4.1	ATG4A-D	11.1111	11.1111	Y73B6BL.7	csp-2	CASP4	6/10	0	Y87G2A.10	vps-28	VPS28	3/6	0/6	4R79.1	nas-6	MEP1A,B	3/6	1/6
F41E6.13	atg-18	WIPI1,2	11.1111	0	ZK863.9	clec-224	OLR1	6/10	0	K02D10.5	snap-29	SNAP29	4/4	0/4	H19M22.3	zmp-2	age/val	3/6	0/6
M03A8.2	atg-2	ATG2A,B	11.1111	0	F21F8.3	asp-5	REN	7/12	0	F35H10.4	vha-5	ATP6V0A1,2,4, TCIRG1	2/6	1/6	ZK20.6	nep-1	alz	1/10	5/10
B0025.1	vps-34	PIK3C3	11.1111	0	C16A3.3	let-716	PDCD11	7/12	0	T25G12.4	rab-6.2	RAB6A,B	2/6	1/6	C34D4.9	NAS‐8	mat	2/6	0/6
D2007.5	atg-13	ATG13	11.1111	0	M117.2	par-5	YWHAZ	5/10	0	Y65B4A.3	vps-20	CHMP6	2/6	1/6	T11F9.6	NAS‐22	val	4/9	1/9
Y60A3A.1	unc-51	MAPK7, ULK1-3	11.1111	0	M110.5	dab-1	DAB1	14/28	0	F55A11.2	syx-5	STX5	4/6	0/6	F21F8.3	asp-5	alz	7/12	0/12
C33A11.4	svh-5	EHF, ELF3, ELF5	11.1111	0	F46C3.1	pek-1	EIF2AK2	8/16	1/16	Y57G11C.4	vti-1	VTI1A	4/6	0/6	Y73B6BL.7	csp-2	alz	6/12	0/12
T22H9.2	atg-9	ATG9A,B	0	33.3333	T05G5.6	ech-6	ECHS1	0	9/12	T10H9.3	syx-18	STX18	3/6	0/6	F57F5.1	cpr-9	mat	1/6	1/6
ZK930.1	vps-15	PIK3R4	0	11.1111	K11E4.3	poml-1	PON1	0	6/10	C18C4.10	klc-2	KLC1,2,4,NPHP3	3/6	0/6	F59D12.4	gpn-1	mat/age	3/6	0/6
F02E8.5	atg-16.1	ATG16L1	0	0	C49C8.5	C49C8.5	FGL2	0	6/10	F55C7.7	unc-73	TRIO,KARLN,ARHGEF25	3/6	0/6	C37C3.6	mig-6	age/val	0/3	2/3
D2085.2	atg-10	ATG10	0	0	C53B4.5	col-119	COL11A1	0	6/10	F37A4.7	rbf-1	RPH3A,DOC2A,B	3/6	0/6	4R79.1	nas-6	mat	3/6	1/6
ZK593.6	lgg-2	MAP1LC3A-C	0	0	G_YK7564	efn-2	EFNA5	1/12	7/12	F56A8.7	unc-64	STX1A,B,STX2,3	2/6	0/6	C05E4.3	srp-1	mat	0/12	6/12
Y55F3AM.4	atg-3	ATG3	0	0	C50H2.1	fshr-1	LHCGR	0	7/12	Y53G8AR.3	ral-1	RALA	3/6	0/6	Y71G12B.11	tln-1	val	0/3	3/3
B0261.2	let-363	MTOR	0	0	ZK20.6	nep-1	MME	1/10	5/10
F35A5.8	F35A5.8	SH3GLB1,2	0	0	AAA28002	deb-1	VCL	1/12	6/12
F23B12.9	egl-1	unknown	33.3333	16.6667	G_YK7584	cri-2	TIMP1	1/12	6/12
C35D10.9	ced-4	unknown	33.3333	0	G_YK8483	Y43C5A.2	FGL2	1/12	6/12
C48D1.2	ced-3	CASP1,CASP2,CASP3,CASP4,CASP5,CASP7,CASP8,CASP9,CASP12,CASP14	30	0	H06I04.3b	H06I04.3	FTSJ3	1/12	6/12
Y17G7B.15	cnt-1	ACAP1-3	0	0	K08B4.1	lag-1	RBPJ	0	5/10
ZK1240.3	ZK1240.3	MID1	50	10	F45E4.9	hmg-5	TFAM	0	5/10
ZK1240.8	ZK1240.8	MID1	40	20	AAC15827	ser-1	HTR2A	0	6/12
D2089.2	marc-2	MARCH1,2,8	40	0	C05E4.3	srp-1	SERPINA1	0	6/12
F10D7.5	F10D7.5	NEURL1,1B,3	20	30
B0281.8	B0281.8	MEFV	20	10
F45G2.6	trf-1	TRAF1-6	20	10
M110.3	M110.3	MARCH5	20	0
Y54G2A.31	ubc-13	UBE2N,UBE2NL	16.6667	0
T05H10.5	ufd-2	UBE4B	16.6667	0
R06F6.2	vps-11	VPS11	16.6667	0
ZK1240.9	ZK1240.9	TRIM69	10	30
F49E12.4	ubc-24	UBE2L6	10	0
ZK1240.6	ZK1240.6	TRIM69	10	0
C28G1.5	rcs-1	MID1	0	40
C28G1.6	C28G1.6	MID1	0	40
F43C11.7	F43C11.7	MID1	0	20
F55A11.3	sel-11	SYVN1	0	16.6667
F11A10.3	mig-32	BMI1,PCGF1,3,5,6	0	10
T09B4.10	chn-1	STUB1	0	0
F26G5.9	tam-1	unknown	0	0
F54G8.4	nhl-1	TRIM71	0	0
F29B9.6	ubc-9	UBE2I	0	0
T10F2.4	prp-19	PRPF19	0	0
