# Supplementary material for: Removal of extracellular human amyloid beta aggregates by extracellular proteases in C. elegans
Source: eLife. 2023 Sep 20;12:e83465. doi: 10.7554/eLife.83465 (PMC10541181; doi:10.7554/eLife.83465)
Supplement: Supplementary file 3. — Detailed overview about the collagens orthologs. [file elife-83465-supp3.xlsx]

## Sheet: Sheet1
Collagen orthologs
RNAi							note	conclusion
Human	clone	name	GFP up	GFP down	developmental delay	n observed
COL25A1/CLAC	F29C4.8	col-99	1	2		16		no change
COL18A1	C36B1.1	cle-1	1	1		22		no change
COL4A5	K04H4.1	emb-9			7	22		no change
Crosses LSD2104 x							note	conclusion
Human	parent	genotype	GFP up	GFP down	developmental delay	n observed
COL25A1/CLAC	RB1165	col-99(ok1204) IV	2	8		16
COL25A1/CLAC	TU1	col-99::GFP::flag	2	9		16	<- could not observe GFP
COL25A1/CLAC	VH2847.1	hdIs73[col-99::GFP, pha-1(+)]	2	10		16		Irrespective of GFP tag or deletion mutant, results are the same.
COL25A1/CLAC	VH2847.2	hdIs73[col-99::GFP, pha-1(+)]	2	12		16		Hence, questionable if this is the effect of col-99.
COL4A5	GG34	emb-9(g34) III	Temperature sensitive. No results.					-
COL4A6	GG37	let-2(g37) X	Temperature sensitive. No results.					-
imaging cross LSD2104 x							note	conclusion
Human	parent	genotype	data type
COL18A1	VC855	cle-1(gk364) I	GFP intensity imaging and score of aggregates					significant reduction in intensity, trend: reduction in flower aggregation type.
COL4A5	NK364	unc-119(ed4) III; qyIs46 [emb-9p::emb-9::mCherry + unc-119(+)]	co-localization imaging					no co-localization of emb-9::mCherry and sf::GFP::AB. Since LET-2 forms a trimer of collagen IV together with EMB-9, it is likely that LET-2 would not interact with AB. However this was not verified here.
								flower structures correlate with muscle tissue
								moss structures correlate with absence of muscle tissue (e.g. hypodermis)
