# Supplementary material for: Removal of extracellular human amyloid beta aggregates by extracellular proteases in C. elegans
Source: eLife. 2023 Sep 20;12:e83465. doi: 10.7554/eLife.83465 (PMC10541181; doi:10.7554/eLife.83465)
Supplement: Supplementary file 4. — Detailed lists of C. elegans strains, bacterial strains, RNA interference (RNAi) clones, plasmids, and primers are provided. [file elife-83465-supp4.xlsx]

## Sheet: 1) C. elegans
Strains from CGC	Strain name	Genotype	Effect genotype
	N2 Bristol	wild type	-
	PD8120	smg-1(cc546) I	Wildtype-like at temperatures lower than 23°C. Reduced degradation of mRNAs with long 3' UTR at temperatures over 23°C.
	VC718	cri-2(gk314) V	1213 bp deletion
	RB2342	adm-2(ok3178) X	989 bp deletion
	RB1165	col-99(ok1204) IV	estimated 1000 bp deletion
	VC855	cle-1(gk364) I	275 bp deletion
	NK364	[emb-9p::emb-9::mCherry + unc-119(+)] X	Integrated collagen::mCherry reporter
Injected strains	New strain name	Genotype	Plasmids used for injection	background strain injected	Integrated?
	LSD2104	[hsp-16.2p::ss::sfGFP::Aβ + rol-6(su1006)]	pLSD134 + pRF4	N2 Bristol	Yes. Backcrossed 4x to N2 Bristol
	LSD1091	[hsp-16.2p::ss::sfGFP::Aβ(F20S/L35P) + rol-6(su1006)], smg-1(cc546) I	pLSD163 + pRF4	PD8120	No, pick rollers to maintain
	LSD1097	[hsp-16::ssGFP + rol-6(su1006)], smg-1(cc546) I	pLSD160 + pRF4	PD8120	No, pick rollers to maintain
	LSD3014	[hsp-16.2p::ss::sfGFP::Aβ + rol-6(su1006)], hsp-16.2p::adm-2::mScarlet-I	pLSD170	LSD2104	No, pick mScarlet-I after induction
Crossed strains	New strain name	Combined genotype	parent strain 1	parent strain 2
	LSD2165	[hsp-16.2p::ss::sfGFP::Aβ + rol-6(su1006)], cri-2(gk314) V	LSD2104	VC718
	LSD2201	[hsp-16.2p::ss::sfGFP::Aβ + rol-6(su1006)], adm-2(ok3178) X	LSD2104	RB2342
	LSD2204	[hsp-16.2p::ss::sfGFP::Aβ + rol-6(su1006)], cri-2(gk314) V, adm-2(ok3178) X	LSD2165	RB2342
	LSD1056	[hsp-16.2p::ss::sfGFP::Aβ + rol-6(su1006)], col-99(ok1204) IV	LSD2104	RB1165
	LSD1052	[hsp-16.2p::ss::sfGFP::Aβ + rol-6(su1006)], cle-1(gk364) I	LSD2104	VC855
	LSD2209	[hsp-16.2p::ss::sfGFP::Aβ + rol-6(su1006)], [emb-9p::emb-9::mCherry + unc-119(+)] X	LSD2104	NK364

## Sheet: 2) Plasmids
												pLSD134
												full plasmid sequence
												CAGGAAACAGCTATGACCATGATTACGCCAAGCTgtaagtttaaacatgatcttactaactaactattctcatttaaattttcagAGCTTAAAAATGGCTGAAATCACTCACAACGATGGATACGCTAACAACTTGGAAATGAAATAAGCTTGCATGCCTGCAGGTCGACTCTAGAGGATCGGcccgggTTAGAGCAAATGTTGTTCGGTATTTATTTTCAACGGTATTTATACTATTTTCCACCTTTTTCTAGAACATTCGAGCTGCTTGTTGCAAAAGGAGGGCGACTCACATTCGGTACATGGAAAAGTAGTGTACACAATAAAGAGACCCAGATACATTTTCCGTCTGCGTCTCTTTGCACCCACCGGGAGTATTTTCAAACGAATGCATCTAGG…
												Translated product as predicted by ExPASy translate tool:
												MIKTYLTLLLLATSATCQKKSATLVSAEGEAPAIKVIKTTGSLLTAIDVSKADLDWEQVTSQQDENKSNREIPKVISEEASDYKDHDGDYKDHDIDYKDDDDKTSTGMSKGEELFTGVVPILVELDGDVNGHKFSVRGEGEGDATNGKLTLKFICTTGKLPVPWPTLVTTLTYGVQCFSRYPDHMKRHDFFKSAMPEGYVQERTISFKDDGTYKTRAEVKFEGDTLVNRIELKGIDFKEDGNILGHKLEYNFNSHNVYITADKQKNGIKANFKIRHNVEDGSVQLADHYQQNTPIGDGPVLLPDNHYLSTQSVLSKDPNEKRDHMVLLEFVTAAGITHGMDELYKEFGSAGSAAGSGEFRSMDAEFRHDSGYEVHHQKLVFFAEDVGSNKGAIIGLMVG…
												backbone from pMH413_AG029
												pLSD163
												full plasmid sequence
												CAGGAAACAGCTATGACCATGATTACGCCAAGCTGTAAGTTTAAACATGATCTTACTAACTAACTATTCTCATTTAAATTTTCAGAGCTTAAAAATGGCTGAAATCACTCACAACGATGGATACGCTAACAACTTGGAAATGAAATAAGCTTGCATGCCTGCAGGTCGACTCTAGAGGATCGGCCCGGGTTAGAGCAAATGTTGTTCGGTATTTATTTTCAACGGTATTTATACTATTTTCCACCTTTTTCTAGAACATTCGAGCTGCTTGTTGCAAAAGGAGGGCGACTCACATTCGGTACATGGAAAAGTAGTGTACACAATAAAGAGACCCAGATACATTTTCCGTCTGCGTCTCTTTGCACCCACCGGGAGTATTTTCAAACGAATGCATCTAGG…
												Translation changes to pLSD134
												MDAEFRHDSGYEVHHQKLVSFAEDVGSNKGAIIGPMVGGVVI <- 2 point mutation sequence
												MDAEFRHDSGYEVHHQKLVFFAEDVGSNKGAIIGLMVGGVVI <- AB 1-42 wildtype sequence
												the sequence, that with the least amount of mutations, gives best solubility. basepair 59 T to C mutation, changing phenylalanine(F) to serine (S) and basepair 104 also a T ot C mutation, changing Leucine (L) to proline (P)
												Based on paper: Mutations that Reduce Aggregation of the Alzheimer’s Ab42 Peptide: an Unbiased Search for the Sequence Determinants of Ab Amyloidogenesis
												by Christine Wurth, Nathalie K. Guimard and Michael H. Hecht* - JMB 2002
												pLSD160
												full plasmid sequence
												CAGGAAACAGCTATGACCATGATTACGCCAAGCTgtaagtttaaacatgatcttactaactaactattctcatttaaattttcagAGCTTAAAAATGGCTGAAATCACTCACAACGATGGATACGCTAACAACTTGGAAATGAAATAAGCTTGCATGCCTGCAGGTCGACTCTAGAGGATCGGcccgggTTAGAGCAAATGTTGTTCGGTATTTATTTTCAACGGTATTTATACTATTTTCCACCTTTTTCTAGAACATTCGAGCTGCTTGTTGCAAAAGGAGGGCGACTCACATTCGGTACATGGAAAAGTAGTGTACACAATAAAGAGACCCAGATACATTTTCCGTCTGCGTCTCTTTGCACCCACCGGGAGTATTTTCAAACGAATGCATCTAGG…
												Translated product as predicted by ExPASy translate tool:
												MIKTYLTLLLLATSATCQKKSATLVSAEGEAPAIKVIKTTGSLLTAIDVSKADLDWEQVTSQQDENKSNREIPKVISEEASDYKDHDGDYKDHDIDYKDDDDKTSTGMSKGEELFTGVVPILVELDGDVNGHKFSVRGEGEGDATNGKLTLKFICTTGKLPVPWPTLVTTLTYGVQCFSRYPDHMKRHDFFKSAMPEGYVQERTISFKDDGTYKTRAEVKFEGDTLVNRIELKGIDFKEDGNILGHKLEYNFNSHNVYITADKQKNGIKANFKIRHNVEDGSVQLADHYQQNTPIGDGPVLLPDNHYLSTQSVLSKDPNEKRDHMVLLEFVTAAGITHGMDELYKEFGSAGSAAGSGEFRSAAAPYK
												pLSD170
												full plasmid sequence
												TGTGAAATTGTTATCCGCTGGTATCAGCTCACTCAAAGGCGGTAATACGGTTATCCACAGAATCAGGGGATAACGCAGGAAAGAACATGTGAGCAAAAGGCCAGCAAAAGACCAGGAACCGTAAAAAGGCCGCGTTGCTGGCGTTTTTCCATAGGCTCCGCCCCCCTGACGAGCATCACAAAAATCGACGCTCAAGTCAGAGGTGGCGAAACCCGACAGGACTATAAAGATACCAGGCGTTTCCCCCTGGAAGCTCCCTCGTGCGCTCTCCTGTTCCGACCCTGCCGCTTACCGGATACCTGTCCGCCTTTCTCCCTTCGGGAAGCGTGGCGCTTTCTCATAGCTCACGCTGTAGGTATCTCAGTTCGGTGTAGGTCGTTCGCTCCAAGCTGGGCTGTG…
												Translated product as predicted by ExPASy translate tool:
												MTDTLDLKLSSRRQWNPVRCPVRLEVDGSAQTPTSLVQTALNNPSFDLVIAAPNGQNVYIPFTEDRKLFTANIADDPSTSSLISHCHFEGVTEDGRHALSLCDPGEITGLLMTQTNRFGLSTSNNGSFVLIPYVENNCDLGSLVHSSSRKKRQIGKQNTVIDRNPSYIREHLDGRKRFVELALVADYSVYTKYDSDEKKVNDYMQQTMNILNSLYFPLNIRITLVHSEIWKKGDQISVIPDSKETLNNFMEYKKIMLKDHFFDTGYLMTTLKFDEGVVGKAYKGTMCSYDYSGGIYVDHNNDTVETVATFAHELGHTFGMDHDPNDKDVCYCPMPRCIMNPQSGHMEVWSECSVKNLASGFNRGIDLCLFNEPGKKPSDAKCGNGIVEPGEECDCGPLK…

## Sheet: 3) Primers
Strain	gene		Source URL
VC718	cri-2(gk314) V	1213 bp deletion	https://wormbase.org/species/c_elegans/variation/WBVar00145721	Alternative primers used	Product
		Internal	Left Oligo: tcacgatcagtcttgggttg	Left Oligo + Right Oligo: GGGTAAAATAAATCAAACTCGC	550 bp if wildtype, no product if mutant
			Right Oligo:tgagcagaacgaaaggaggt
		External	Left Oligo: accgattcaattcgctcaac	Left Oligo + Right Oligo: TGAGCAGAACGAAAGGAGGT	No product if wildtype, 1300 bp if mutant
			Right Oligo: cttgacctctctttggcagg
RB2342	adm-2(ok3178) X	989 bp deletion	https://cgc.umn.edu/strain/RB2342
		Internal	Left Oligo: tccagattcaaaagagacgttg	internal primer pair worked nicely	1253 bp product if wildtype, 204 pb product if mutant
			Right Oligo: ccactgagcgtagtccacct
		External	Left Oligo: gggagatcaaatttcggtga
			Right Oligo: cgattggcggaaattctaaa
RB1165	col-99(ok1204) IV	estimated 1000 bp deletion	https://cgc.umn.edu/strain/RB1156
		Internal	Left Sequence: ggcagaagtacgacgagagg
			Right Sequence: tggtaaaggccgatacgaac
		External	Outer Left Sequence: tgtctccgtctccttttgct
			Right Sequence: tggcggttctgatatcttcc
VC855	cle-1(gk364) I	275 bp deletion	https://wormbase.org/species/c_elegans/variation/WBVar00145770#0216-45-3
		Internal	Left Oligo: cacaatcgttgagcatctgg	left oligo cgaacagaagtcggaggcca
			Right Oligo: acaaccgcttatctctgcgt	right inside deletion oligo tatggtgggatgcacctccg	777 bp if wildtype, 502 bp if mutant
		External	Left Oligo: attcacaaaccgggatgaaa	right outside deletion oligo actcactcaactgccactca	407 bp if wildtype, no product if mutant
			Right Oligo: ccgttcgtctctttccacat
